# Supplementary material for: Qualitative study of UK health professionals’ experiences of working at the point of care during the COVID-19 pandemic
Source: PubMed Central journal article supplement — BMJ Open. 2021 Sep 6;11(9):e054377. doi: 10.1136/bmjopen-2021-054377 (PMC8423514; doi:10.1136/bmjopen-2021-054377), 2021-09-06
Supplement: bmjopen-2021-054377.draft_revisions.pdf [file bmjopen-2021-054377.draft_revisions.pdf]

# BMJ Open

BMJ Open is committed to open peer review. As part of this commitment we make the peer review history of every article we publish publicly available.

When an article is published we post the peer reviewers' comments and the authors' responses online. We also post the versions of the paper that were used during peer review. These are the versions that the peer review comments apply to.

The versions of the paper that follow are the versions that were submitted during the peer review process. They are not the versions of record or the final published versions. They should not be cited or distributed as the published version of this manuscript.

BMJ Open is an open access journal and the full, final, typeset and author-corrected version of record of the manuscript is available on our site with no access controls, subscription charges or pay-per-view fees (<http://bmjopen.bmj.com>).

If you have any questions on BMJ Open's open peer review process please email [info.bmjopen@bmj.com](mailto:info.bmjopen@bmj.com)

# BMJ Open

**A qualitative study of health professionals experiences of working at the point of care during the COVID-19 pandemic, impact on health and wellbeing and support needs.**

|                               |                                                                                                                                                                                                        |
|-------------------------------|--------------------------------------------------------------------------------------------------------------------------------------------------------------------------------------------------------|
| Journal:                      | <i>BMJ Open</i>                                                                                                                                                                                        |
| Manuscript ID                 | bmjopen-2021-054377                                                                                                                                                                                    |
| Article Type:                 | Original research                                                                                                                                                                                      |
| Date Submitted by the Author: | 13-Jun-2021                                                                                                                                                                                            |
| Complete List of Authors:     | Baldwin, Sharin; University of Warwick, Warwick Clinical Trials Unit; London North West Healthcare NHS Trust<br>George, Joicy; University of West London, College of Nursing, Midwifery and Healthcare |
| Keywords:                     | COVID-19, MENTAL HEALTH, PUBLIC HEALTH                                                                                                                                                                 |
|                               |                                                                                                                                                                                                        |

SCHOLARONE™  
Manuscripts

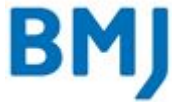

I, the Submitting Author has the right to grant and does grant on behalf of all authors of the Work (as defined in the below author licence), an exclusive licence and/or a non-exclusive licence for contributions from authors who are: i) UK Crown employees; ii) where BMJ has agreed a CC-BY licence shall apply, and/or iii) in accordance with the terms applicable for US Federal Government officers or employees acting as part of their official duties; on a worldwide, perpetual, irrevocable, royalty-free basis to BMJ Publishing Group Ltd ("BMJ") its licensees and where the relevant Journal is co-owned by BMJ to the co-owners of the Journal, to publish the Work in this journal and any other BMJ products and to exploit all rights, as set out in our [licence](#).

The Submitting Author accepts and understands that any supply made under these terms is made by BMJ to the Submitting Author unless you are acting as an employee on behalf of your employer or a postgraduate student of an affiliated institution which is paying any applicable article publishing charge ("APC") for Open Access articles. Where the Submitting Author wishes to make the Work available on an Open Access basis (and intends to pay the relevant APC), the terms of reuse of such Open Access shall be governed by a Creative Commons licence – details of these licences and which [Creative Commons](#) licence will apply to this Work are set out in our licence referred to above.

Other than as permitted in any relevant BMJ Author's Self Archiving Policies, I confirm this Work has not been accepted for publication elsewhere, is not being considered for publication elsewhere and does not duplicate material already published. I confirm all authors consent to publication of this Work and authorise the granting of this licence.

1  
2  
3  
4  
5 **A qualitative study of health professionals' experiences of**  
6 **working at the point of care during the COVID-19**  
7 **pandemic, impact on health and wellbeing and support**  
8 **needs.**  
9  
10  
11  
12  
13  
14  
15

16 **Authors:**

17 Sharin Baldwin<sup>1</sup>

18 Joicy George<sup>2</sup>

19  
20  
21  
22  
23  
24  
25  
26 <sup>1</sup>NIHR Clinical Research Fellow, University of Warwick/ Clinical Academic Lead  
27 (Nursing), London North West University Healthcare Trust, London, UK.

28  
29  
30  
31 <sup>2</sup>Lecturer in Adult Nursing, University of West London, London, UK.

32  
33  
34  
35  
36  
37  
38  
39  
40  
41 **Corresponding author: Sharin Baldwin**

42 Address: 43 The Chase, Eastcote, Pinner HA5 1SH

43 Email: [sharin.baldwin@nhs.net](mailto:sharin.baldwin@nhs.net)

44 Telephone: 07956 581635

45  
46  
47  
48  
49 **Key words:** COVID-19, nurses, doctors, allied health professionals, mental  
50 wellbeing.

51  
52  
53  
54 **Word count:** 7687

## ABSTRACT

**Objectives:** To develop an understanding of health professionals' experiences of working at the point of care during the COVID-19 pandemic, the impact on their health and wellbeing and their support needs.

**Design:** A qualitative study using semi-structured interviews. Data were analysed using Framework analysis.

**Setting:** One large National Health Service (NHS) integrated care trust.

**Participants:** A purposive sample of qualified doctor, nurse or allied health professional working with COVID-19 patients admitted to the hospitals between March – May 2020 were eligible to take part.

**Results:** Eight major categories were identified: 1) Working in a 'war zone', 2) 'Going into a war zone without a weapon', 3) 'Patients come first', 4) Impact of Covid-19, 5) Leadership & Management, 6) Communication, Care and Compassion, 7) Health professionals' support needs, and 8) Camaraderie and Pride. Health professionals reported increased levels of stress, anxiety and a lack of sleep. They prioritised their patients' needs over their own and felt a professional obligation to be at work. A key finding was the reported camaraderie amongst the health professionals where they felt that they were 'fighting this war together'.

**Conclusions:** This study provides a valuable insight into the experiences of some of the frontline health professionals working in a large London based hospital trust during the first Covid-19 peak. Findings from this study could be used to inform how managers, leaders and organisations can better support their health professional staff during the current pandemic and beyond.

## Strengths and limitations of this study

- At the time when the study was undertaken little was known about how UK frontline health professionals wanted to be supported to maintain and/or enhance their physical and mental health and wellbeing.
- NHS trusts across the country are offering many wellbeing resources aimed at their staff, but it is not known whether these are adequate to meet the needs of health professionals working during the pandemic.
- Using a qualitative methodology enabled the collection and analysis of in-depth data about the needs and experiences of frontline health professionals', highlighting ways in which they could be better supported.
- Use of framework analysis enabled data exploration while simultaneously maintaining an effective and transparent audit trail, enhancing the rigour of the analytical processes and credibility of the findings.
- It is acknowledged that the study findings may not be representative of the experiences and views of all frontline health professionals within the organisation. It however provides a valuable insight into the experiences of some of the frontline health professionals working in a large London based hospital trust during the first Covid-19 peak, which may be of relevance for health professionals in other settings.

## Background

Healthcare professionals have been at the forefront of dealing with the Covid-19 pandemic since March 2020. The virus initially spread rapidly in London compared to the rest of the country and placed an overwhelming demand on the National Health Service (NHS). Doctors, nurses and allied health professionals are at the forefront of the NHS, working under extremely difficult conditions during this pandemic and therefore likely to be at an increased risk of negative impacts to their health and wellbeing.

A quantitative study from China reported that frontline healthcare providers treating patients with COVID-19 had greater risks of mental health problems, such as anxiety, depression, insomnia, and stress [1]. Currently there is a longitudinal survey, the ICON study, underway in the UK led by the Royal College of Nursing Research Society Steering Group, in collaboration with a number of universities [2]. This survey is evaluating the impact of COVID-19 on the UK nursing and midwifery workforce at three time points: prior to COVID-19 peak, during the COVID-19 peak, and in the recovery period following COVID-19. The first survey of 2600 members of the nursing and midwifery workforce suggested that 74% felt their personal health was at risk, 92% were worried about risks to their family members due to their clinical role, and almost 33% reported severe or extremely severe depression [2]. The responses from this first survey highlighted the need to provide supportive interventions during and after COVID-19 to support individual's psychological and physical health needs. According to the project lead Dr Keith Couper, "urgent research is needed to develop and evaluate interventions to support individuals"[2].

A qualitative study of the experiences of healthcare providers in China suggested that nurses and physicians were challenged by working in a totally new context, and

1  
2  
3 reported exhaustion due to heavy workloads and protective gear, the fear of  
4  
5 becoming infected and infecting others, feeling powerless to handle patients'  
6  
7 conditions, and difficulty in managing relationships in this stressful situation [3]. At  
8  
9 the time when this study began there were no other qualitative studies undertaken or  
10  
11 published to inform how health professionals would like to be supported to maintain  
12  
13 and/or enhance their physical and mental health and wellbeing. NHS trusts across  
14  
15 the country are offering many wellbeing resources aimed at their staff, but it is not  
16  
17 known whether these are adequate to meet the needs of health professionals  
18  
19 working during the pandemic. This study was therefore designed to gain a better  
20  
21 understanding of frontline health professionals' experiences and highlight ways in  
22  
23 which doctors, nurses and allied health professionals want to be supported during  
24  
25 these extraordinary times. The findings from this study can help shape services to  
26  
27 provide better support to their health professionals during the Coronavirus pandemic  
28  
29 and any subsequent waves in the future.  
30  
31  
32  
33  
34  
35  
36  
37  
38

### 39 **Aims/ Objectives**

40  
41  
42 The aim of this study was to provide a broader understanding of the experiences and  
43  
44 needs of doctors, nurses and allied health professionals during and after the COVID-  
45  
46 19 outbreak, and how they could be better supported. There were three main  
47  
48 objectives, which were to gain a broader understanding of:  
49

- 50  
51 • frontline health professionals' experiences of working during the COVID-19  
52  
53 pandemic
- 54  
55 • the reported impact of this work on frontline health professionals' physical and  
56  
57 mental health, and  
58  
59  
60



- how doctors, nurses and allied health professionals could be better supported to promote/enhance their physical and mental wellbeing during and after COVID-19.

## **Methods**

A qualitative approach was used to address the study aims and objectives. Doctors, nurses and allied health professionals were recruited from three hospital sites across a large London based hospital Trust. Data from the Office for National Statistics showed that the borough in which the hospital is situated was the second most affected by the COVID-19 virus in London [4], therefore this trust was considered to be ideal for this study.

Any qualified doctor, nurse or allied health professional working with COVID-19 patients admitted to the hospitals between March – May 2020 were eligible to take part. Students, managers and those not providing direct patient care were excluded.

### ***Inclusion criteria***

- Qualified doctor, nurse or allied health professional
- Working during March – May 2020
- Providing direct patient care
- In one of the trust hospital sites

### ***Exclusion criteria***

- Student nurses/ student doctors/ student allied professionals
- Agency staff, not employed by the trust
- Managers

- Those not providing direct patient care
- Those not working during the period between March – May 2020

### ***Patients and public Involvement***

There was no patient involved in this study.

Three healthcare professionals were involved in guiding the planning and conduct of the study. Nurses contributed to the development of the study protocol. An independent clinical representative was involved in the data analysis process.

### ***Data Collection and Analysis***

At the time of the study, both authors worked in the hospital trust where the study was undertaken. The study was advertised using posters at all hospital sites and those interested in taking part contacted the researchers. Participants were given a Participation Information Sheet and written informed consent (Appendix – 1) was obtained prior to participation. One-off in-depth qualitative interviews were conducted (including face-to-face and telephone interviews) by both authors with a purposive sample of 19 health professionals meeting the inclusion criteria, until no new information was forthcoming and data saturation was reached. A topic guide was developed to provide structure and focus to the interviews (Appendix – 2) and piloted during the first two interviews conducted by each author. The interviews were audio-recorded and transcribed using an approved transcription service. All interviews took place ensuring privacy, with no one else present apart from the participant and interviewer. Participants were offered an opportunity to check their interview transcript for accuracy and provide feedback prior to analysis. The duration of the

1  
2  
3 interviews varied between 15 and 60 minutes, with the average being 33 minutes.

4  
5 Field notes were written after each interview to record aspects of the interview that  
6  
7 may not be captured on the recording such as environment, context, general  
8  
9 observations and thoughts.  
10

11  
12  
13  
14 The research team consisted of the first author (SB), who undertook all aspects of  
15  
16 this study, with support from the second author (JG) who was involved in developing  
17  
18 the study protocol, study design, data collection and data analysis. None of the study  
19  
20 participants worked in the authors' own teams. An independent clinical  
21  
22 representative (who was not involved in the data collection process) was involved in  
23  
24 the data analysis process for quality assurance and reduce any risk of bias. Data  
25  
26 were analysed using thematic analysis informed by framework analysis and the five  
27  
28 steps of data management: familiarisation; constructing an initial thematic  
29  
30 framework; indexing and sorting; reviewing data extracts; and data summary and  
31  
32 display, followed by a process of abstraction and interpretation [5, 6]. This method  
33  
34 was chosen as it would enable the identifying, analysing and interpreting of patterns  
35  
36 and meaning within qualitative data. Furthermore, this method is not tied to a  
37  
38 particular epistemological or theoretical perspective, making it very flexible and  
39  
40 appropriate for this study [7].  
41  
42  
43  
44  
45  
46  
47  
48

### 49 **Ethical Consideration**

50  
51 The study was conducted in compliance with the Research Governance Framework  
52  
53 for Health and Social Care and Good Clinical Practice. All interviews were carried  
54  
55 out on a voluntary basis and participants could withdraw from the study at any stage,  
56  
57 although none chose to do so. The interviews were transcribed with the principle of  
58  
59 anonymity in mind and a confidentiality agreement was in place for the approved  
60

1  
2  
3 transcribing service used. Professional backgrounds of participants or the specific  
4 site that they worked at have not been presented in the 'Participant Characteristics'  
5  
6 table to minimise the risk of individuals being identified due to the small sample size.  
7  
8  
9  
10

### 11 ***Ethics approval Statement***

12  
13  
14 Health Research Authority and Health and Care Research Wales (HCRW) approval  
15 was received for this study on 29 June 2020 (IRAS: 286213/ REC reference:  
16  
17 20/HRA/3206).  
18  
19  
20  
21  
22  
23  
24

## 25 **Results**

### 26 ***Participant Characteristics***

27  
28  
29 Of the 19 participants, six were doctors, eight nurses and five allied health  
30 professionals (to include physiotherapists, speech & language therapists). There was  
31 representation from junior and senior members of staff from each of these  
32 professional groups. Participants' ages ranged from 29 to 59 years, and over two  
33 thirds of the participants were female (n=13), with six being male. Nine described  
34 their ethnic background as White (English = 8, Irish = 1); seven as Asian (Indian= 5,  
35 Pakistani=1, Mauritian = 1); and three as Black (British = 1, Caribbean = 1, other =  
36  
37 1). All three hospital sites were represented in the sample. See table 1 for full  
38  
39 participant characteristics.  
40  
41  
42  
43  
44  
45  
46  
47  
48  
49  
50  
51  
52  
53  
54  
55  
56  
57  
58  
59  
60

Table 1: Participant characteristics

| No.        | Sex | Age   | Ethnicity        |
|------------|-----|-------|------------------|
| <b>P1</b>  | F   | 45-49 | White/ English   |
| <b>P2</b>  | F   | 25-29 | White/ English   |
| <b>P3</b>  | F   | 30-34 | Asian/ Indian    |
| <b>P4</b>  | M   | 30-34 | Asian/ Indian    |
| <b>P5</b>  | F   | 40-44 | White/ English   |
| <b>P6</b>  | F   | 55-59 | White/ English   |
| <b>P7</b>  | M   | 25-29 | Asian/ Indian    |
| <b>P8</b>  | F   | 30-34 | White/ English   |
| <b>P9</b>  | M   | 30-34 | Asian/ Indian    |
| <b>P10</b> | M   | 30-34 | White/ English   |
| <b>P11</b> | F   | 40-44 | Black/ Caribbean |
| <b>P12</b> | M   | 30-34 | Asian/ Mauritian |
| <b>P13</b> | F   | 45-49 | White/ English   |
| <b>P14</b> | F   | 25-29 | Asian/ Indian    |
| <b>P15</b> | F   | 30-34 | White/ Irish     |
| <b>P16</b> | M   | 25-29 | Asian/ Pakistani |
| <b>P17</b> | F   | 35-39 | White/ English   |
| <b>P18</b> | F   | 35-39 | Black British    |
| <b>P19</b> | F   | 45-49 | Black Other      |

Eight major categories (and subcategories) pertaining to frontline health professionals' experiences, impact and needs were identified from the data:

- 1
- 2
- 3 1. Working in a 'war zone'
- 4
- 5 2. 'Going into a war zone without a weapon'
- 6
- 7
- 8 3. 'Patients come first'
- 9
- 10 4. Impact of Covid-19
- 11
- 12 5. Leadership & Management
- 13
- 14 - Communication, Care and Compassion
- 15
- 16 - 'There was them and us'
- 17
- 18 6. Support systems
- 19
- 20 7. Health professionals' support needs
- 21
- 22 - Acknowledgement, Praise and Recognition
- 23
- 24 - De-briefing and psychological support
- 25
- 26 - Better Information, Communication and Leadership
- 27
- 28 - Adequate staff facilities
- 29
- 30
- 31
- 32
- 33 8. Camaraderie and Pride: 'we are in it together'
- 34
- 35
- 36
- 37

### 38 **1. Working in a 'war zone'**

39  
40 Health professionals described their experience as working in a 'war zone'. They  
41 talked about the enormity of it as *"it was like that scene on ET, all that plastic..... So,*  
42 *there's all this plastic and, I get it, but just walking into this other world, there was just*  
43 *mayhem, pandemonium. People running around, alarms going off..... it was like a*  
44 *war zone. That's how everyone equated it to, that the rules had completely changed,*  
45 *absolutely changed."* (P1)  
46  
47  
48  
49  
50  
51  
52  
53

54 It was something that they had never experienced before or even anticipated and  
55 described it as an 'out of world' experience which they were not prepared for:  
56  
57  
58  
59  
60

1  
2  
3 *"...you are like an astronaut going to some special mission, like you are going inside*  
4 *a special room, something like that. And it was really tough, in fact, there were like*  
5 *so many sick patients, so many young sick patients coming, plus the older sick*  
6 *patients."* (P4)  
7  
8  
9  
10  
11  
12  
13  
14

15 Health professionals talked about the fear they felt coming into work, they described  
16 it as being *"absolutely terrifying"*, *"pure fear, pure anxiety, of death"* (P1), and that  
17 *"the mental fear was something awful"* (P3).  
18  
19  
20  
21  
22  
23

24 *"I remember walking into the ward and just this feeling of dread of like, "OK. I don't*  
25 *really want to be here, but I know that I've just got to get on and do it.""* (P13)  
26  
27  
28  
29  
30

31 Some also described feeling confused, angry and frustrated with the speed in which  
32 everything progressed, resulting in additional demands placed on staff, as reflected  
33 in the quotes below:  
34  
35  
36

37 *"I think initially I was confused, I suppose would be one of the words, because I think*  
38 *when it first came in, as with everyone else, I wasn't sure quite how serious it was*  
39 *going to be in the very early stages..... And I think it was the speed at which it*  
40 *progressed which was intimidating, I guess, in ways."* (P10)  
41  
42  
43  
44  
45  
46  
47  
48

49 *"Frustrated and angry.....I did not ... that was my first medical shift in the trust*  
50 *covering the wards, and I didn't want to come back and work again"* (P12)  
51  
52  
53  
54  
55  
56  
57  
58  
59  
60

## 2. 'Going into a war zone without a weapon'

Personal safety and the lack of adequate Personal Protective Equipment (PPE) featured strongly in the interviews, leaving health professionals feeling disappointed, frustrated and angry about not being adequately protected. Many compared it to being in a war zone without a weapon.

*"It's like a basic right to be protected. Like, this is a war. You wouldn't send soldiers out without any....weapons... equipment and armour and guns, that kind of stuff. Like, you have to be protected"* (P2)

*"... police officers don't go out without a stab vest, firemen don't go out without wearing the full protective gear ... why are healthcare staff any different? Why are we not provided with the appropriate [PPE]"* (P12)

*"It was like I'm going to the war zone and I've got no weapon. Where is my weapon?"* (P11)

The shortage of PPE meant that health professionals avoided discarding their masks or taking adequate breaks due to the fear of their PPE not being replaced as reflected in these accounts:

*"because if you're worried that if you throw this and if you don't have a new one, even if it is infected, you're going to keep it"* (P4)

*"Well, I need to go out to the loo, and I better not because there might not be PPE to be able to get back in. So, I better hang on, or do I really need my break. Maybe I won't have my break." So, that was difficult"* (P6)

Health professionals recognised the national PPE guidance was constantly changing, and although this was frustrating they wanted "... more support from the



1  
2  
3 *trust, needed to be updated, needed, and I think more help and guidance on like the*  
4  
5 *PPE I think was a big issue. Because one week you had to wear full gown, full*  
6  
7 *apron, the whole shebang, and then the next week no you didn't..... There were all*  
8  
9 *these changes which was affecting all of us" (P8)*  
10  
11  
12  
13  
14  
15

### 16 **3. 'Patients come first'**

17  
18  
19 There was a strong sense of professional duty amongst the health professionals,  
20  
21 where they prioritised their patients' needs before their own. This was common  
22  
23 amongst all three professional groups.  
24  
25

26  
27 *"I felt that, as a nurse, it's my duty and it's my responsibility to be for the patient any*  
28  
29 *time, no matter what comes" (P4)*  
30  
31

32  
33 *"I think as health professionals I think it's something we're good at. People have a*  
34  
35 *sense of duty; they want to help. That's why they're there" (P10)*  
36  
37

38  
39 *"I think as a medical professional it is always very much you look after everybody*  
40  
41 *else and your attitude is always, "Yes, I'm fine. Yes, I'm fine. Yes, I'm fine. Yes, I'm*  
42  
43 *fine." Even if you're not fine..." (P13)*  
44  
45

46  
47 Nurses described as being adaptable and having to take on multiple roles for their  
48  
49 patients, *"to be a carer, they had to be a comforter; they had to be an advisor, a*  
50  
51 *counsellor to the families. At the same time, to be a nurse" (P4)*  
52

53  
54 *"we survived because we are nurses, like me, we can survive, we can easily adapt*  
55  
56 *to changes" (P3)*  
57  
58  
59  
60

1  
2  
3 Some talked about the change in public perception of healthcare professional during  
4 the pandemic and found being called ‘Heroes’ and being clapped for an  
5 uncomfortable experience, when they were simply fulfilling their duties:  
6  
7

8  
9  
10  
11 *“.....with the whole clapping and just how the government sort of dealt with things. I*  
12 *just felt it was really embarrassing” (P9)*  
13

14  
15  
16 *“I think as a doctor you – or as a nurse, or actually anybody in health, it’s, “Oh, you*  
17 *work for the NHS,” and it’s so taken for granted, and just that change of feeling of the*  
18 *country of, “The NHS has to save us,” and suddenly you’re sort of put up as these*  
19 *amazing people that do all of these incredible things, and you think, “Well, I’m just*  
20 *doing what I always do.”” (P13)*  
21  
22  
23  
24  
25  
26  
27  
28  
29  
30

#### 31 **4. Impact of Covid-19**

32  
33 Working during the pandemic had a negative impact on most participants. Some  
34 talked about contracting Covid-19 and the symptoms associated with the infection,  
35 while many talked about the exhaustion and tiredness of working during this  
36 demanding period and the impact on their mental health:  
37  
38  
39  
40  
41  
42  
43  
44

45 *“I actually don’t think I’ve really experienced anxiety to this level that I had at the*  
46 *beginning of this pandemic” (P9)*  
47

48  
49  
50 *“I remember one day I finished my shift, outside, my car, and I cried in the car park”*  
51 *(P18)*  
52

53  
54  
55 Participants talked not being able to sleep due to the increased levels of anxiety at  
56 work and how that impacted on their physical and mental health:  
57  
58  
59  
60

1  
2  
3 *“So there was a lot of unhealthy eating and kind of not sleeping at the same time,*  
4 *stress levels were quite high, anxiety was quite high. So that did have an impact, and*  
5 *I’m sure this had impacted on my blood pressure, worsened my cardiovascular risk*  
6 *... but I’ve not formally measured it” (P12)*  
7  
8  
9

10  
11  
12  
13 *“...from the beginning of it, I wasn’t sleeping. I’d done three weeks of long days, and*  
14 *I wasn’t sleeping. And it was really affecting me. Everything was affecting me. And I*  
15 *ended up having PTSD, it was diagnosed as. So, I ended up being really anxious”*  
16 *(P1)*  
17  
18  
19  
20  
21

22  
23 Having to come into work also had a negative impact on participants’ family  
24 members which often added to their existing anxieties. They talked about family  
25 members being distressed and worried about their safety, as reflected below:  
26  
27  
28  
29

30 *“Well, my daughter was crying every day, yeah. She said, ‘Are you working with*  
31 *COVID patients?’”(P1)*  
32  
33  
34  
35

36 *“...my dad, who was very worried for me, he was concerned that there wasn’t*  
37 *enough PPE and things like that, and he was keeping up to date by watching the*  
38 *news” (P8)*  
39  
40  
41  
42  
43  
44  
45  
46

## 47 **5. Leadership & Management**

### 48 ***Communication, Care and Compassion***

49  
50  
51 Health professionals described varying experiences relating to leadership and  
52 management. In areas where there was good communication and support, it resulted  
53 in positive experiences, as reflected below:  
54  
55  
56  
57  
58  
59  
60

1  
2  
3 *“..my manager always used to come around and have a look around us, make sure*  
4 *that those who are on work were well taken care of. Come and chat with us, ask us*  
5 *how is everything, is everything OK, and then to support in that time, like we had”*  
6  
7

8  
9  
10 (P4)

11  
12  
13 *“We had quite clear leadership and ... although information was changing, we were*  
14 *told why it was changing, what was going on, we understood the changes to the*  
15 *department physically, we understood as we became more aware of what the*  
16 *patients were presenting like, a better idea of what to do next with them” (P17)*  
17  
18  
19

20  
21  
22  
23 Many however felt that they were not treated with care or compassion by their senior  
24 managers, as a redeployed nurse, speaking about the nurse in charge stated: *“Not a*  
25 *word of appreciation, not a word of thank you, and she didn’t just ask me, “Are you*  
26 *OK? Can you go home? Are you OK to handover?” Nothing. She just stood at the*  
27 *door and she waved her hand [good-bye]” (P3)*  
28  
29

30  
31  
32  
33  
34  
35 Similar feelings were expressed by medical staff where one felt *“...doctors were*  
36 *being treated numbers once again, and healthcare just being treated like numbers”*  
37  
38 (P9). This health professional went on to say *“I generally don’t think the working*  
39 *environment for NHS is that well supported, just generally, despite COVID. That’s*  
40 *just personally how I feel. I feel like medicine as an institution there still exists a lot of*  
41 *bullying, there still exists a lot of competitive natures, like cutthroat, which is part of*  
42 *the process” (P9)*  
43  
44  
45  
46  
47  
48  
49  
50

51  
52  
53 Some felt that they were not being listened to and compassion was lacking from their  
54 managers *“...I felt like I was being patronised.....I thought it was forced, but I felt our*  
55 *voice as staff was not heard.....our needs was not met.....Compassion was not*  
56  
57  
58  
59  
60

1  
2  
3 shown..... *Caring was not shown, and that did not sit well with me because we are a*  
4 *nursing profession and our role is to show compassion and caring*" (P11).  
5  
6  
7  
8  
9

### 10 11 **'There was them and us'**

12  
13  
14  
15 There was a general feeling amongst most junior health professionals that there was  
16 a hierarchical management system where the senior manager/leaders were less  
17 visible at the frontline during the pandemic:  
18  
19

20  
21  
22  
23 *"You didn't really see much of a physical presence of anyone from the higher*  
24 *management that were on the shop floor telling you, "Well done", or "Thank you for*  
25 *what you're doing." So that I didn't feel that we were supported from the kind of*  
26 *higher-up management"* (P12)  
27  
28  
29

30  
31  
32  
33 *"I have never seen any of the management people in the PPE to come in and to see*  
34 *what happens"* (P3)  
35  
36  
37

38 The lack of communication between senior and junior staff seems to play a big part  
39 in staff feeling this divide:  
40  
41

42  
43  
44 *"There's been difficulty with [Band] 8s.....the Band 8 have been involved in various*  
45 *meetings, and they've been involved with things or making decisions that we've felt*  
46 *that they could have, "Can we just share your experience?" they've not really shared*  
47 *our experience and they sometimes make some sweeping statements of what we're*  
48 *going to do and how we're going to change. It would have been nice if they could*  
49 *have talked to us"* (P6)  
50  
51  
52  
53  
54  
55

56  
57  
58 *"it would have been nice to have been told what was happening"* [by senior staff]  
59  
60 (P8)

1  
2  
3 *“Decisions were made where I was working, and it can be a bit hierarchical at times.*  
4  
5 *I think communication around the decisions was often a bit convoluted....”* (P10)  
6  
7  
8  
9  
10

## 11 **6. Support systems**

12  
13  
14  
15 Most health professionals were aware of a range of support services provided by the  
16  
17 organisation. They particularly valued the regular ‘Communication’ emails and the  
18  
19 information available on the Trust intranet:  
20  
21

22  
23 *“I thought the communication emails that we received, and at one point we were*  
24  
25 *receiving them almost daily or certainly a few times a week, I found them really*  
26  
27 *useful actually”* (P10)  
28  
29

30  
31 *“...the information was on the intranet, so that was made ready and available by the*  
32  
33 *trust, too. So it was easy to go into there and to get that information”* (P19)  
34  
35

36  
37 Most also mention the support on offer from the psychology team and some had  
38  
39 accessed this service. Some however talked about the difficulties associated with  
40  
41 being able to access the services on offer: *“I know there is some, but if I’m honest*  
42  
43 *I’m not exactly sure how I would go about going into it. I know during the pandemic*  
44  
45 *they were putting on some things, but unfortunately they were often like at times*  
46  
47 *when I was in working or on shift or something. So, I wasn’t able to get along.”* (P10)  
48  
49

50  
51 Most staff, however, accessed support from their team members and work  
52  
53 colleagues, and found this to be beneficial:  
54  
55

56 *“I think having a team around, a really supportive team was really beneficial”* (P5)  
57  
58  
59  
60

1  
2  
3 *“... work colleagues would try and support each other. There was a bit of a more*  
4 *team ethos. So that helped with coping with the stress, and just ... bounce some of*  
5 *the issues that we had with each other” (P12)*  
6  
7  
8  
9

10 Support from friends and family also played an important role in helping health  
11 professionals deal with their stress and anxieties.  
12  
13  
14  
15  
16  
17  
18

## 19 **7. Health professionals’ support needs**

### 20 ***Acknowledgement, Praise and Recognition***

21  
22  
23 Participants wanted to feel valued by being acknowledged, recognised and praised  
24 by senior leaders and managers for the work that they were doing during this difficult  
25 time. They wanted this to be a personalised approach rather than a generic one, as  
26 reflected below:  
27  
28  
29  
30  
31  
32  
33  
34

35  
36 *“I think recognition of the team’s effort by the trust, not a generic e-mail or a thank-*  
37 *you that gets sent, but ... somebody from senior management actually coming down*  
38 *and saying to people on the shop floor, “Well done for what you’ve done, and thank*  
39 *you for what you’ve done.” I know it’s part of our job, but sometimes you do feel*  
40 *undervalued and under-represented by ... I think undervalued, not under-*  
41 *represented, undervalued by the trust in terms of how things are” (P12)*  
42  
43  
44  
45  
46  
47  
48  
49

50 *“the trust to bear in mind, we all work very, very, very hard, and a little bit of*  
51 *acknowledgement” (P19)*  
52  
53  
54  
55  
56  
57  
58  
59  
60

### **De-briefing and psychological support**

Health professionals wanted opportunities to debrief and to have access to psychological support. Having this support available locally in their own work settings/ departments was thought to be more appropriate in encouraging staff to access it more readily:

*"...if there was someone like to come to us when we are in the clinical setup, if there is someone to come to us and to speak to us, like during our breaks" (P3)*

*"Whereas I do think sometimes if there's a person or a presence of someone to come, and you can kind of put a face to it, that, for me personally, makes it more relatable and perhaps less intimidating to go and have these conversations or join these classes and things that you want to do" (P10)*

Some suggested having protected time would enable staff to collectively reflect on their experiences, debrief, and share learning while also focusing on the positive outcomes:

*"...also focussing on the positives. Like, the positive case studies. So, somebody that came in and they're treatment from beginning to end" (P2)*

*"I think it would be really nice to get together and have a sort of, like, you know, be reflective, talk about what we didn't enjoy, well what went wrong, how we can improve. Because if there was to be a second wave again, then we can learn from it and put those ideas forward" (P8)*



### **Better Information, Communication and Leadership**

Health professionals wanted improved communication from managers and leaders and this to be provided locally, face-to-face rather than through emails:

*“maybe I would have been grateful like in the morning, if there is some safety briefing or at the end of the day, some briefing session or something like that” (P3)*

*“I just think we just need more support and just to be updated, to be told what’s happening. I know we’re getting the regular emails, but specifically to our ward, what’s happening [ward], and having like maybe a weekly meeting or something too” (P8)*

*“..perhaps having someone come to where you work to explain exactly what’s available” (P10)*

Junior health professionals wanted to be informed and involved in the decision making process around issues that affected them, one person stated: *“The only thing I would love to happen is most probably, is for the Trust to support probably – to incorporate the lower grade staff in their decision making” (P11)*

The need for improved leadership through having a senior health professional oversee the team or department was seen as being important. A nurse who was redeployed to another area of work stated: *“I should say there should be someone to overlook, like it will be great, if we are deployed, if we get a person, like a specific person ‘this many group of people can speak to this person specially and that person is available at the clinical centre’.... If there is a specific person like that, like we can share our concerns and issues” (P3)*

1  
2  
3 The overall feeling was that *“there could have been more leadership from the seniors*  
4 *to create an environment that was like, you know, “If you don’t feel like you should be*  
5 *working, please come and see us, or please to go occupational health,” or maybe*  
6 *there should have been more emails given by occupational health to see if we were*  
7 *suitable to work.”* (P9)

8  
9  
10  
11  
12  
13  
14  
15 More involvement from managers and working together with health professionals at  
16 the frontline was viewed as being necessary to being an effective leader: *“I would*  
17 *suggest is, managers take front line if it happens again, because that in itself will*  
18 *prevent your staff from calling sick. That in itself will motivate your staff from getting*  
19 *up in the morning, from coming to work. I know we have managers things to do, but*  
20 *just for two days, you can do it for days”* (P11)

### 31 32 33 **Adequate staff facilities**

34  
35  
36 As health professionals working on the frontline, participants wanted their basic  
37 needs to be met. They wanted to have access to adequate clothing (scrubs), PPE  
38 and facilities for changing, showering and resting, as reflected below:

39  
40  
41  
42  
43  
44 *“I would like a simple thing, like we have a space to just relax or like we have some*  
45 *time off.....So I just feel like if we have some kind of a small, like an entertainment or*  
46 *a relaxing zone anywhere in our hospitals where staff can sit down and relax.....Like*  
47 *it could be anything, like we have a refreshing zone or like we have a small gaming*  
48 *zone or like we have a small sofa, a two-seater relaxing sofa. Or we have some*  
49 *Internet facility or like we have books to read or anything of that kind of a zone”* (P4)

1  
2  
3 *“more importantly, an area where I could leave my clothes and my shoes, change*  
4 *into scrubs and shoes and then, at the end of my shift, have an area again where I*  
5 *can take away my dirty clothes, maybe have a shower, clean myself, sanitise myself,*  
6 *put on my clean clothes and go back out.” (P12)*  
7  
8  
9  
10  
11  
12

13 Overall health professionals felt it was *“important to make sure everything is put in*  
14 *place, all the PPEs, all the right gears are put in place” (P19)*  
15  
16  
17  
18  
19  
20  
21

## 22 **8. Camaraderie and Pride: ‘we are in it together’**

23 Working during the pandemic brought about a sense of camaraderie amongst the  
24 health professionals, which was seen as a positive aspect.  
25  
26  
27  
28

29 Participants’ comments included:  
30  
31

32 *“We’ve got closer. There’s just a camaraderie.... it’s that kind of thing, like we’ve all*  
33 *been through it, and ... no, not with my colleagues. If anything, it’s affected it for the*  
34 *better” (P1)*  
35  
36  
37  
38  
39

40 *“I feel like there’s a community within nursing, and then there was a community*  
41 *within caring for people with COVID, because it was such a like exceptional*  
42 *circumstance and then everyone was in it together, and it was so horrible that I feel*  
43 *like we had a – I almost feel like we had a mutual understanding of each other and a*  
44 *mutual respect” (P2)*  
45  
46  
47  
48  
49  
50

51  
52 *“They were all together working as nurses for a single goal – treat COVID-19*  
53 *patients” (P4)*  
54  
55  
56  
57  
58  
59  
60

1  
2  
3 This camaraderie was felt amongst all three professional groups, and health  
4 professionals reported working together across professional boundaries, breaking  
5 some of the traditional practices, as demonstrated in the following statements:  
6  
7  
8  
9

10  
11 *"I think it was one of the positives from the whole thing was the camaraderie I felt*  
12 *with other people on the unit where I work. ....so, where we were, we weren't able to*  
13 *do certain things as therapists, so we were doing a lot of nursing shifts instead, and it*  
14 *was sort of a real roll your sleeve up and muck in"* (P10)  
15  
16  
17  
18  
19

20  
21 *"...on the shop floor we supported one another. That was very ... there was that*  
22 *team ethos, ..... if I had gone into the bay, and a patient had requested to use a*  
23 *commode, for example, instead of me calling for a nurse or for a HCA to give the*  
24 *commode, because I'm already there in the bay, I would take the commode and tend*  
25 *to the patient ..."* (P12)  
26  
27  
28  
29  
30  
31  
32

33  
34 *"... there was a lot more camaraderie..... we got to know colleagues from around the*  
35 *rest of the hospital, and we were suddenly just all pulling together, whereas before,*  
36 *there would be the usual tensions.....All that had gone, really, we were all trying to*  
37 *work together"* (P17)  
38  
39  
40  
41  
42

43 In addition, health professionals felt a sense of pride in being able to contribute to  
44 this crisis and as a result better prepared to take on such challenges in the future.

45 One clinician stated: *"I think what we had was the worst and still we managed it, so*  
46 *we have that experience in our hand, that will help us"* (P7)  
47  
48  
49  
50  
51  
52

53 Another said, *"I think it's made us stronger really, because we worked well as a*  
54 *team. So, we've overcome like many challenges, and we have, you know, to say that*  
55 *I was a nurse on the front line is, not to say it's an accomplishment, but you're never*  
56 *going to forget that"* (P8)  
57  
58  
59  
60

1  
2  
3 Seeing the speed in which changes were made within the healthcare setting was  
4  
5 another positive aspect, as reflected below:  
6  
7

8 *“I think it was interesting seeing, actually, when there was a massive crisis like this*  
9 *how within health how actually things could change so quickly. So, there’s often so*  
10 *much inertia, months and months go by, decisions aren’t made, “You can’t do this.*  
11 *No we can’t do that. No we’ve never done it like this, so we can’t do that,” and*  
12 *actually it was quite enlightening to see that actually when things need to change*  
13 *and they need to change quickly, they did. And there were huge changes within the*  
14 *Trust, moving wards, increasing intensive care beds, mobilisation of staff, everybody*  
15 *doing different roles, and that for me was brilliant to see, that actually it can happen”*  
16  
17 (P13).  
18  
19  
20  
21  
22  
23  
24  
25  
26  
27  
28  
29  
30  
31  
32

### 33 **Discussion**

34  
35  
36 Frontline health professionals in this study compared their experience of working  
37 during the first wave of the Covid-19 pandemic to working in a war zone. The  
38 analogy used could be explained by the unprecedented situation they found  
39 themselves in, having to balance the needs of their own families against the demand  
40 of their jobs. Most were fearful of coming to work after witnessing high volumes of  
41 deaths caused by the virus. The situation was made worse by the lack of adequate  
42 PPE available to them, resulting in health professionals feeling disappointed,  
43 frustrated and angry. Again, health professionals compared the situation to being in  
44 a *war zone without a weapon*. At the time, a similar picture was seen across the UK  
45 with reports of inadequate provisions of PPE [2, 8], as well as inadequate COVID-19  
46 testing for healthcare staff [9] and unclear infection control policies in some  
47  
48  
49  
50  
51  
52  
53  
54  
55  
56  
57  
58  
59  
60

1  
2  
3 healthcare settings [10]. Maben and Bridges posit that the failure to protect nursing  
4 staff adequately and the resulting anger and frustration due to them feeling unsafe at  
5 work, may linger after the crisis potentially causing some to leave the profession [11].  
6  
7  
8  
9  
10 This could also apply to doctors and allied health professionals working in such  
11  
12 conditions.  
13  
14

15 Most health professionals in the current study reported increased levels of stress,  
16  
17 anxiety and a lack of sleep. This is hardly surprising as evidence from studies on  
18  
19 previous outbreaks of emerging viruses (including SARS, covid-19, MERS, Ebola  
20  
21 and influenza) suggest that up to a third of staff will experience high levels of distress  
22  
23 [12]. Healthcare workers in countries that experienced the peak of Covid-19 infection  
24  
25 earlier than the UK were more likely to experience symptoms of anxiety and  
26  
27 depression than before the pandemic [13]. Reports of stress, anxiety, depression  
28  
29 and insomnia in health professionals working on the frontline during Covid has also  
30  
31 been reported in other studies carried out in the UK (University of Warwick, 2020)  
32  
33 and internationally [14, 15, 16, 17, 18]. In a survey of 996 health and social care staff  
34  
35 (75% of whom were employed by the NHS) by the Institute for Public Policy  
36  
37 Research, 50% reported that their mental health had declined during the first two  
38  
39 months of the pandemic [19]. In another survey of 921 allied health professionals,  
40  
41 86% reported feeling stressed with regards to changes in their work environment and  
42  
43 transmission of the virus [20]. Interestingly in this study, levels of stress were  
44  
45 dependent upon access to PPE and mental health resources [20]. Similarly in other  
46  
47 surveys, 45% of doctors reported experiencing depression, anxiety, stress, burn-out  
48  
49 or other mental health conditions related to the outbreak (undertaken in May  
50  
51 2020),[8], and 33% of nurses and midwives reported severe or extremely severe  
52  
53 depression, anxiety or stress (undertaken in April 2020),[2]. Additionally six months  
54  
55  
56  
57  
58  
59  
60

1  
2  
3 into the pandemic, 76% of almost 42,000 nurses surveyed by the Royal College of  
4  
5 Nursing (RCN) reported an increase in their stress levels since the advent of the  
6  
7 pandemic, with 52% concerned about their mental health [9].  
8  
9

10  
11 Frontline health professionals' mental health needs to be adequately supported  
12  
13 especially as this is a workforce that was already experiencing high levels of stress  
14  
15 prior to the pandemic. In the decade preceding the onset of the pandemic, symptoms  
16  
17 of anxiety and depression were reported in between 17 to 52% of doctors [21], with  
18  
19 potentially higher levels among nurses [22]. There is a well evidenced link between  
20  
21 staff wellbeing and quality of care delivery. The World Health Organization (WHO)  
22  
23 has recently highlighted that 'keeping all staff protected from chronic stress and poor  
24  
25 mental health during this response means that they will have a better capacity to fulfil  
26  
27 their roles' [23]. Conversely, without good mental health or psychosocial support for  
28  
29 health professionals there is a risk to the quality of care delivered to their patients  
30  
31 [24]. A recent report by The King's Fund also highlighted the importance of focusing  
32  
33 on the health and wellbeing of nurses and midwives, which is essential to the quality  
34  
35 of care they can provide for people, affecting their compassion, professionalism and  
36  
37 effectiveness [25].  
38  
39  
40  
41  
42  
43  
44  
45

46 It has been reported that healthcare professionals are good at coping and often have  
47  
48 a strong belief that they should be able to deal with anything that comes along in  
49  
50 their personal or professional domain [26]. This was evident amongst the health  
51  
52 professionals in this study where they prioritised the needs of their patients over their  
53  
54 own and felt a professional obligation to be at work. This can often generate a  
55  
56 superhuman philosophy that makes it difficult for healthcare professionals to admit  
57  
58 that they are experiencing stress [26], a trait that was also seen amongst the  
59  
60

1  
2  
3 participants in this study. This may have implications for how these health  
4  
5 professionals are supported during such difficult times.  
6  
7  
8  
9

10 In this study, most health professionals were aware of the services available to them  
11 through their organisation, including support from psychological services. However  
12 they wanted a more personalised approach to dissemination of information through  
13 face-to-face contacts and debriefs. Health professionals reported good levels of  
14 support from their work colleagues and family members, but a 'disconnect' between  
15 junior and senior staff. Interestingly, Maben and Bridges reported findings from  
16 studies of members of the armed forces where team cohesion was noted horizontally  
17 (between colleagues) and vertically (between leaders and their teams) [11]. This was  
18 also highly correlated with mental health, with a reported 10-fold difference in  
19 trauma-related mental health status between troops who perceived themselves as  
20 having a good or bad leader [27]. In the current study, where there was good  
21 communication and staff felt supported, they reported good leadership. A lack of  
22 communication, care and compassion was associated with a divide between  
23 managers and junior health professionals. Therefore there are a number of things that  
24 managers and leaders could do to improve staff wellbeing. This includes being  
25 visible and approachable and inviting feedback from team members; communicating  
26 regularly in a honest and open manner, acknowledging team members' contributions  
27 and providing praise; and prioritising wellbeing, mandating breaks and creating  
28 opportunities for teams to meet together [11, 28, 29, 30]. There may have been  
29 legitimate reasons for senior managers and leaders not being visible during this  
30 study as they were also faced with this unprecedented situation, having to make  
31 changes based on the rapidly changing national guidance, however if this was  
32 communicated to the frontline staff then that may have reduced the 'divide' felt by  
33  
34  
35  
36  
37  
38  
39  
40  
41  
42  
43  
44  
45  
46  
47  
48  
49  
50  
51  
52  
53  
54  
55  
56  
57  
58  
59  
60



1  
2  
3 participants between junior and senior staff. It is also important that senior health  
4 professionals seek support for themselves, so that they have the capacity to support  
5 others and are able to role model good self-care (Maben and Bridges, 2020). Health  
6 professionals in this study highlighted a need for access to psychological therapies  
7 and opportunities for reflective space to enable them to think about their experiences  
8 and process their emotions. Attendance at talking therapies and reflective groups  
9 however should be optional and tailored to individual need [11].  
10  
11  
12  
13  
14  
15  
16  
17  
18  
19  
20

21 Another important need identified by the health professionals was the lack of  
22 adequate facilities within their workplace for breaks, rest, showering, dressing or  
23 storing personal belongings. Referring to Maslow's hierarchy of needs, physiological  
24 and safety needs are the first two levels which must be met before individuals can be  
25 motivated and turn their attention toward others [31]. Therefore, it is fundamental that  
26 health professionals' basic needs are prioritised by ensuring the availability of  
27 adequate facilities to meet their physiological needs, as well as access to adequate  
28 protective equipment to meet their safety needs, as discussed previously. This has  
29 also been highlighted by other researchers [32, 33].  
30  
31  
32  
33  
34  
35  
36  
37  
38  
39  
40  
41  
42  
43  
44

45 A positive aspect of this study was the camaraderie seen across the frontline health  
46 professionals. The pandemic has created a special professional bond amongst the  
47 staff where they felt that they were *fighting this war* together. In the military, bonds  
48 between team members has been reported to build resilience amongst troops [34],  
49 which echoes the messages from the participants in this study. Health professionals  
50 working together across professional boundaries, is a welcomed move which will  
51 hopefully continue beyond the Covid-19 pandemic, resulting in more collaborative  
52 working amongst nurses, doctors and allied health professionals.  
53  
54  
55  
56  
57  
58  
59  
60

1  
2  
3  
4  
5  
6 It is acknowledged that due to the qualitative nature of this study and the small  
7  
8 sample size, the study findings may not be representative of the experiences and  
9  
10 views of all frontline health professionals within the organisation. Study limitations  
11  
12 also included that only volunteer frontline health professionals participated, which  
13  
14 may have resulted in recruiting those who were specifically interested in the topic  
15  
16 area. Also only nurses, doctors and allied health professionals working within the  
17  
18 acute setting were included. It is recognised that health professionals from other  
19  
20 groups (such as midwives, healthcare assistants, students etc.) and settings  
21  
22 (community, clinics, primary care etc.) may have similar experiences, which were not  
23  
24 captured in this study and would benefit from being included in future studies. This  
25  
26 study however provides a valuable insight into the experiences of some of the  
27  
28 frontline health professionals working in a large London based hospital trust during  
29  
30 the first Covid-19 peak. Findings from this study could be used to inform how  
31  
32 managers, leaders and organisations can better support their clinical staff during the  
33  
34 current pandemic and beyond. Health professionals who are better supported in  
35  
36 practice give better care to patients, increasing staff engagement and improving  
37  
38 retention rates [35]. Being able to better support the needs of the clinical workforce  
39  
40 could therefore also contribute to better patient care and improved retention of  
41  
42 clinical staff during and after this pandemic.  
43  
44  
45  
46  
47  
48  
49  
50  
51  
52  
53

#### 54 **Implications for practice:**

55  
56 There are a number of measures that individual, managers/leaders and  
57  
58 organisations can take to improve the health and wellbeing of frontline health  
59  
60 professionals, as outlined below:

**Individuals**

- Be kind to yourself!
- Take regular breaks, keep hydrated and eat well
- Find out about all the support services available and make use of them
- If you are not coping it is okay to ask for help, talk to a colleague or manager
- Focus on what you have done well and celebrate them
- Look out for your colleagues and offer them support if they need it (including, talking, signposting them to supportive resources, promoting their wellbeing).

**Managers/Leaders**

- Seek support for yourselves, so that you have the capacity to support others and are able to role model good self-care
- Be visible, approachable and available to junior staff in a crisis, showing care and compassion
- Maintain regular honest and open communication with your team members
- Create opportunities for debriefing within your team, inviting feedback from team members
- Involve team members in decision making processes, affecting the team
- Acknowledge team members contributions and provide praise
- Prioritise staff wellbeing, mandating breaks and creating opportunities for teams to meet together
- Ensure staff have access to adequate facilities such as rest areas, showering and changing facilities etc.
- Ensure you are aware of all support services on offer so that you can utilise them and signpost your team members to them when necessary

## Organisations

- Provide adequate food, drink and rest facilities
- Ensure staff do not exceed safe hours by encouraging reporting and monitoring of hours, and encouraging staff to take annual leave and breaks
- Proactively address resource inequities across the organisation
- Provide regular situational updates for all staff, including realistic and frank information about risk and adverse events
- Provide regular praise and acknowledgement of staff working during these exceptional circumstances
- Ensure that staff safety is a priority and providing adequate PPE
- Support managers and leaders in the skills needed to support their teams, such as debriefing practices, identifying psychological distress, and the promotion of mental health and wellbeing
- Ensure staff have access to psychological support
- Keep communication channels open with staff at all levels, giving junior staff opportunities to voice their concerns and be heard
- Where possible disseminate information using personalised approaches, through forums, meetings and regular briefings as well as other formal methods (emails, newsletters etc).

**Acknowledgements:** We would like to thank all the health professionals who took part in this study, for sharing their views and personal experiences during these difficult times, without which this study would not have been possible. We would also like to thank the NHS trust for supporting this study to be undertaken. This study was

1  
2  
3 carried out during the first wave of the Covid-19 pandemic when everyone  
4  
5 throughout the NHS was faced with this unprecedented situation. Since then a  
6  
7 Health & Wellbeing strategy has been developed and many wellbeing initiatives have  
8  
9 been implemented in the trust where the study was undertaken.  
10  
11  
12  
13

### 14 **Contributors**

15  
16 SB and JG developed and designed the research proposal, negotiated access to the  
17  
18 study-site, obtained the required approvals, recruited participants, conducted the  
19  
20 interviews, undertook the data analysis. SB wrote the first draft of this paper. JG  
21  
22 commented on the draft manuscripts and contributed to the final version of the  
23  
24 paper.  
25  
26  
27  
28  
29  
30

31 **Competing interests:** None declared  
32  
33  
34

35 **Funding:** No external funding was received for this study.  
36  
37  
38  
39

40 **Data sharing statement:** Selected anonymised qualitative data from the interviews  
41  
42 could be made available on request.  
43  
44  
45  
46  
47  
48  
49  
50  
51  
52  
53  
54  
55  
56  
57  
58  
59  
60

## References

1. Liu, Q., Luo, D., Haase, J.E., Guo, Q., Wang, X.Q., Liu, S., Xia, L., Liu, Z., Yang, J., Yang, B.X. (2020a) The experiences of health-care providers during the COVID-19 crisis in China: a qualitative study. *Lancet Global*, [https://doi.org/10.1016/S2214-109X\(20\)30204-7](https://doi.org/10.1016/S2214-109X(20)30204-7)
2. University of Warwick (2020) Survey of UK nurses and midwives' highlights their concerns about health, training and workload during COVID-19. [https://warwick.ac.uk/newsandevents/pressreleases/survey\\_of\\_uk](https://warwick.ac.uk/newsandevents/pressreleases/survey_of_uk) (accessed 21 May 2020)
3. Liu, S., Yang, L., Zhang, C., Xiang, Y.T., Liu, Z., Hu, S., Zhang, B. (2020b) Online mental health services in China during the COVID-19 outbreak. *Lancet Psychiatry*, Published Online February 18, 2020 [https://doi.org/10.1016/S2215-0366\(20\)30077-8](https://doi.org/10.1016/S2215-0366(20)30077-8)
4. ONS (2020) Deaths involving COVID-19 by local area and socioeconomic deprivation: deaths occurring between 1 March and 17 April 2020. <https://www.ons.gov.uk/peoplepopulationandcommunity/birthsdeathsandmarriages/deaths/bulletins/deathsinvolvingcovid19bylocalareasanddeprivation/deathsoccurringbetween1marchand17april> (accessed 12 May 2020)
5. Spencer L, Ritchie J, Ormston R, O'Connor W, Barnard M. (2014a) Analysis: Principles and Processes In: Ritchie J et al (eds). *Qualitative research practice: a guide for social science students and researchers*, 2nd edn. London: Sage.
6. Spencer L, Ritchie J, O'Connor W, Morrell G, Ormston R. (2014b) Analysis in Practice. In: Ritchie J et al (eds). *Qualitative research practice: a guide for social science students and researchers*, 2nd edn. London: Sage.
7. Baldwin, S., Bick, D. (2021) Using framework analysis in health visiting research: Exploring first-time fathers' mental health and wellbeing. *Journal of Health Visiting*, 9(5): 206-213.
8. British Medical Association (2020) BMA COVID-19 survey. <https://www.bma.org.uk/advice-and-support/covid-19/what-the-bma-is-doing/covid-19-bma-actions-and-policy/covid-19-analysing-the-impact-of-coronavirus-on-doctors>
9. Royal College of Nursing (2020) Researching the impact of COVID-19: ICON Study <https://www.rcn.org.uk/magazines/bulletin/2020/june/icon-research-nursing-study-professor-kelly-covid-19>

10. Williamson, V., Murphy, D., Greenberg, N. (2020) COVID-19 and experiences of moral injury in frontline key workers. *Occupational Medicine*, 70:317–319.
11. Maben, J., Bridges, J. (2020) Covid-19: Supporting nurses' psychological and mental health. *Journal of Clinical Nursing*, 29:2742–2750.
12. Bloomfield, M., Greene, T., Billings, J. (2020) Covid trauma response working group rapid opinion: The case for a trauma-informed response to COVID-19. <https://www.traumagroup.org/>
13. Moreno, C., Wykes, T., Galderisi, S., Nordentoft, M., Crossley, N., Jones, N., Cannon, M., Correll, C.U., Byrne, L., Carr, S., Chen, E.Y.H., Gorwood, P., Johnson, S., Kärkkäinen, H., Krystal, J.H., Lee, J., Lieberman, J., López-Jaramillo, C., Männikkö, M., Phillips, M.R., Uchida, H., Vieta, E., Vita, A., Arango, C. (2020) How mental health care should change as a consequence of the COVID-19 pandemic. *Lancet Psychiatry* 2020; 7: 813–24.
14. Cai, H., Tu, B., Ma, J., et al. (2020) Psychological impact and coping strategies of frontline medical staff in Hunan between January and March 2020 during the outbreak of coronavirus disease 2019 (COVID-19) in Hubei, China. *Med Sci Monit.*, 26:e924171-1-16.
15. Shaukat, N., Mansoor Ali, D., Razzak, J. (2020) Physical and mental health impacts of COVID-19 on healthcare workers: a scoping review. *International Journal of Emergency Medicine*, 13:40. <https://doi.org/10.1186/s12245-020-00299-5>
16. Simone, L. Gnagnarella, C. (2020) Differences between health workers and general population in risk perception, behaviors, and psychological distress related to COVID-19 spread in Italy. <https://psyarxiv.com/84d2c/>
17. Shreffler, J., Petrey, J., Huecker, M. (2020) The Impact of COVID-19 on Healthcare Worker Wellness: A Scoping Review. *Western Journal of Emergency Medicine*, 21(5): 1059-1066.
18. Wu, Y., Wang, J., Luo, C., et al. (2020) A comparison of burnout frequency among oncology physicians and nurses working on the front lines and usual wards during the COVID-19 epidemic in Wuhan, China. *J Pain Symptom Manage*, 60(1):e60-5.
19. Thomas, C., Quilter-Pinner, H. (2020) Care fit for carers: ensuring the safety and welfare of NHS and social care workers during and after Covid-19. IPPR, the Institute for Public Policy Research. <https://www.ippr.org/research/publications/care-fit-for-carers>



- 1  
2  
3 20. Coto, J., Restrepo, A., Ivette, C., Prentiss, S. (2020) The impact of COVID-19 on  
4 allied health professions. PLoS ONE 15(10): e0241328.  
5 <https://doi.org/10.1371/journal.pone.0241328>  
6  
7
- 8 21. Imo, U.O. (2018) Burnout and psychiatric morbidity among doctors in the UK: a  
9 systematic literature review of prevalence and associated factors. British  
10 Psychiatric Bulletin, 41: 197-204.  
11  
12
- 13 22. Koutsimani, P., Montgomery, A., Georganta, K. (2019) The Relationship  
14 Between Burnout, Depression, and Anxiety: A Systematic Review and Meta-  
15 Analysis. Frontiers of Psychology, 10:284. doi: 10.3389/fpsyg.2019.00284  
16  
17
- 18 23. World Health Organization (2020) Mental health and psychosocial  
19 considerations during the COVID-19 outbreak.  
20 [www.who.int/docs/defaultsource/coronaviruse/mental-health-considerations.pdf](http://www.who.int/docs/defaultsource/coronaviruse/mental-health-considerations.pdf)  
21  
22
- 23 24. Baldwin, S., Stephen, R., Bishop, P., Kelly, P. (2020) Development of the  
24 Emotional Wellbeing at Work Virtual Programme to support UK health visiting  
25 teams. Journal of Health Visiting, 8(12): 516-522.  
26  
27
- 28 25. West, M., Bailey, S., Williams, E. (2020) The courage of compassion: Supporting  
29 nurses and midwives to deliver high-quality care.  
30 [www.kingsfund.org.uk/publications/courage-compassion-supporting-nurses-](http://www.kingsfund.org.uk/publications/courage-compassion-supporting-nurses-)  
31  
32
- 33 26. Royal College of Nursing (2015) Stress and you: a short guide to coping with  
34 pressure and stress. Healthy workplace, healthy you. London: RCN.  
35  
36
- 37 27. Jones, N., Seddon, R., Fear, N. T., McAllister, P., Wessely, S., Greenberg, N.  
38 (2012) Leadership, cohesion, morale, and the mental health of UK armed forces  
39 in Afghanistan. Psychiatry, 2012(75), 49–59.  
40  
41
- 42 28. Adams, J. G., Walls, R. M. (2020) Supporting the health care workforce during  
43 the COVID-19 global epidemic. JAMA, 323(15), 1439  
44 <https://doi.org/10.1001/jama.2020.3972>  
45  
46
- 47 29. Billings, J., Kember, T., Greene, T., Grey, N., El-Leithy, S., Lee, D., Bloomfield,  
48 M. (2020) Guidance for planners of the psychological response to stress  
49 experienced by hospital staff associated with COVID: Early interventions. COVID  
50 trauma response working Group rapid Guidance. [https://www.aomrc.org.uk/wp-](https://www.aomrc.org.uk/wp-content/uploads/2020/03/Guidance-for-planners-of-the-psychological-response-to-stress-experienced-by-HCWs-COVID-trauma-response-working-group.pdf)  
51 [content/uploads/2020/03/Guidance-for-planners-of-the-psychological-response-](https://www.aomrc.org.uk/wp-content/uploads/2020/03/Guidance-for-planners-of-the-psychological-response-to-stress-experienced-by-HCWs-COVID-trauma-response-working-group.pdf)  
52 [to-stress-experienced-by-HCWs-COVID-trauma-response-working-group.pdf](https://www.aomrc.org.uk/wp-content/uploads/2020/03/Guidance-for-planners-of-the-psychological-response-to-stress-experienced-by-HCWs-COVID-trauma-response-working-group.pdf)  
53  
54  
55  
56  
57  
58  
59  
60



- 1  
2  
3 30. Chen, SC., Lai, YH., Tsay, SL. (2020) Nursing Perspectives on the Impacts of  
4 COVID-19. The Journal of Nursing Research, 28(3): Pe85.  
5 doi:10.1097/jnr.0000000000000389  
6  
7  
8 31. Maslow, A. H. (1943). A theory of human motivation. Psychology Review, 50 (4),  
9 370-96.  
10  
11  
12 32. Dewey, C., Hingle, S., Goelz, E., Linzer, M. (2020) Supporting clinicians during  
13 the COVID-19 pandemic. Ann Intern Med, 2:172(11):752-753.  
14  
15  
16 33. Giannis, D., Geropoulos, G., Matenoglou, E. (2020) Impact of coronavirus  
17 disease 2019 on healthcare workers: beyond the risk of exposure. Postgrad Med  
18 Journal, 0:1–3.  
19  
20  
21 34. Greenberg, N., Wessely, S., Wykes, T. (2015) Potential mental health  
22 consequences for workers in the Ebola Regions of West Africa- a lesson for all  
23 challenging environments. Journal of Mental Health, 24(1): 1–3.  
24  
25  
26 35. NHS Employers (2019) Stress and its impact on the workplace.  
27 [https://www.nhsemployers.org/retention-and-staff-experience/health-and-  
28 wellbeing/taking-a-targeted-approach/taking-a-targeted-approach/stress-and-its-  
29 impact-on-the-workplace](https://www.nhsemployers.org/retention-and-staff-experience/health-and-wellbeing/taking-a-targeted-approach/taking-a-targeted-approach/stress-and-its-impact-on-the-workplace)  
30  
31  
32  
33  
34  
35  
36  
37  
38  
39  
40  
41  
42  
43  
44  
45  
46  
47  
48  
49  
50  
51  
52  
53  
54  
55  
56  
57  
58  
59  
60

**Appendix - 1**  
**CONSENT FORM**

Title of Project: Study of frontline clinicians during COVID-19

Name of Researcher taking consent: Sharin Baldwin

Please initial box

1. I confirm that I have read the information sheet dated 25/06/20 (version 2) for the above study. I have had the opportunity to consider the information, ask questions and have had these answered satisfactorily.

2. I understand that my participation is voluntary and that I am free to withdraw at any time without giving any reason, without my medical care or legal rights being affected.

3. I understand that the information collected about me will be used to support other research in the future, and may be shared anonymously with other researchers.

4. I understand that the interview will be audio- recorded.

5. I agree to take part in the above study.

|                     |      |           |
|---------------------|------|-----------|
|                     |      |           |
| Name of Participant | Date | Signature |

|                               |      |           |
|-------------------------------|------|-----------|
|                               |      |           |
| Name of Person taking consent | Date | Signature |

*When completed: 1 for participant; 1 for researcher site file.*

## Appendix – 2

### Interview Topic Guide

***The interview should take no longer than 60 minutes and you are free to leave the study at any point. Do you have any questions before we start the interview?***

1. Tell me about your experience of working during the COVID-19 pandemic?
2. How do you feel about it at the time? Could you describe the overall feelings while you were working with COVID-19 patients?
3. How prepared did you feel? What would have helped you to prepare better?
4. How has working during this period impacted on your physical health?
5. How has working during this period impacted on your emotional/ mental health?
6. How has the pandemic affected your friends and family? What impact has that had on your wellbeing?
7. How has the pandemic affected your relationships with work colleagues? What impact has that had on your wellbeing?
8. How have you coped with the challenges during this period?
9. What available support systems/ services are you aware of?
10. What support or resources have you accessed? *This could be face-to-face, telephone, online etc.*
11. How were you supported in your workplace? How was the support from your team?  
How was the support from the wider organisation?
12. What support, information, or resources did you find helpful?
13. What other information/ resources do you think would help you or you would find useful?
14. What have been the barriers to accessing help/ support?
15. What has/ would enable you to better access help or support?
16. What would help you prepare better if there is second surge?
17. Is there anything else that you would like to share about your experiences that I haven't asked?

***This is the end of the interview. I would like to thank you very much for taking part in this study. Do you have any questions you would like to ask?***

## Consolidated criteria for reporting qualitative studies (COREQ): 32-item checklist

Developed from:

Tong A, Sainsbury P, Craig J. Consolidated criteria for reporting qualitative research (COREQ): a 32-item checklist for interviews and focus groups. *International Journal for Quality in Health Care*. 2007. Volume 19, Number 6: pp. 349 – 357

**YOU MUST PROVIDE A RESPONSE FOR ALL ITEMS. ENTER N/A IF NOT APPLICABLE**

| No. Item                                       | Guide questions/description                                                                                                                              | Reported on Page #  |
|------------------------------------------------|----------------------------------------------------------------------------------------------------------------------------------------------------------|---------------------|
| <b>Domain 1: Research team and reflexivity</b> |                                                                                                                                                          |                     |
| <i>Personal Characteristics</i>                |                                                                                                                                                          |                     |
| 1. Interviewer/facilitator                     | Which author/s conducted the inter view or focus group?                                                                                                  | Pages 6-7           |
| 2. Credentials                                 | What were the researcher's credentials?<br>E.g. PhD, MD                                                                                                  | Title page          |
| 3. Occupation                                  | What was their occupation at the time of the study?                                                                                                      | Page 6 & Title page |
| 4. Gender                                      | Was the researcher male or female?                                                                                                                       | Female              |
| 5. Experience and training                     | What experience or training did the researcher have?                                                                                                     | Title page          |
| <i>Relationship with participants</i>          |                                                                                                                                                          |                     |
| 6. Relationship established                    | Was a relationship established prior to study commencement?                                                                                              | Pages 6-7           |
| 7. Participant knowledge of the interviewer    | What did the participants know about the researcher? e.g. personal goals, reasons for doing the research                                                 | Pages 6-7           |
| 8. Interviewer characteristics                 | What characteristics were reported about the inter viewer/facilitator? e.g. Bias, assumptions, reasons and interests in the research topic               | Page 8-9            |
| <b>Domain 2: study design</b>                  |                                                                                                                                                          |                     |
| <i>Theoretical framework</i>                   |                                                                                                                                                          |                     |
| 9. Methodological orientation and Theory       | What methodological orientation was stated to underpin the study? e.g. grounded theory, discourse analysis, ethnography, phenomenology, content analysis | Page 7              |
| <i>Participant selection</i>                   |                                                                                                                                                          |                     |
| 10. Sampling                                   | How were participants selected? e.g. purposive, convenience, consecutive, snowball                                                                       | Pages 6-7           |
| 11. Method of approach                         | How were participants approached? e.g. face-to-face, telephone, mail, email                                                                              | Pages 6-7           |
| 12. Sample size                                | How many participants were in the study?                                                                                                                 | Page - 6            |
| 13. Non-participation                          | How many people refused to participate or dropped out? Reasons?                                                                                          | Page - 6            |

|                                        |                                                                                                                                 |               |
|----------------------------------------|---------------------------------------------------------------------------------------------------------------------------------|---------------|
| <i>Setting</i>                         |                                                                                                                                 |               |
| 14. Setting of data collection         | Where was the data collected? e.g. home, clinic, workplace                                                                      | Page - 6      |
| 15. Presence of non-participants       | Was anyone else present besides the participants and researchers?                                                               | Page 6        |
| 16. Description of sample              | What are the important characteristics of the sample? e.g. demographic data, date                                               | Pages 8-9     |
| <i>Data collection</i>                 |                                                                                                                                 |               |
| 17. Interview guide                    | Were questions, prompts, guides provided by the authors? Was it pilot tested?                                                   | Page - 6      |
| 18. Repeat interviews                  | Were repeat inter views carried out? If yes, how many?                                                                          | N/A           |
| 19. Audio/visual recording             | Did the research use audio or visual recording to collect the data?                                                             | Pages 6-7     |
| 20. Field notes                        | Were field notes made during and/or after the inter view or focus group?                                                        | Page - 7      |
| 21. Duration                           | What was the duration of the inter views or focus group?                                                                        | Pages 6-7     |
| 22. Data saturation                    | Was data saturation discussed?                                                                                                  | Page - 6      |
| 23. Transcripts returned               | Were transcripts returned to participants for comment and/or correction?                                                        | Pages 6-7     |
| <b>Domain 3: analysis and findings</b> |                                                                                                                                 |               |
| <i>Data analysis</i>                   |                                                                                                                                 |               |
| 24. Number of data coders              | How many data coders coded the data?                                                                                            | Page - 7      |
| 25. Description of the coding tree     | Did authors provide a description of the coding tree?                                                                           | N/A           |
| 26. Derivation of themes               | Were themes identified in advance or derived from the data?                                                                     | Page - 7      |
| 27. Software                           | What software, if applicable, was used to manage the data?                                                                      | N/A           |
| 28. Participant checking               | Did participants provide feedback on the findings?                                                                              | Pages 6-7     |
| <i>Reporting</i>                       |                                                                                                                                 |               |
| 29. Quotations presented               | Were participant quotations presented to illustrate the themes/findings? Was each quotation identified? e.g. participant number | Pages 10 -25  |
| 30. Data and findings consistent       | Was there consistency between the data presented and the findings?                                                              | Pages 10 -25  |
| 31. Clarity of major themes            | Were major themes clearly presented in the findings?                                                                            | Pages 10 -25  |
| 32. Clarity of minor themes            | Is there a description of diverse cases or discussion of minor themes?                                                          | Pages 25 - 30 |

Once you have completed this checklist, please save a copy and upload it as part of your submission. When requested to do so as part of the upload process, please select the file type: *Checklist*. You will NOT be able to proceed with submission unless the checklist has been uploaded. Please DO NOT include this checklist as part of the main manuscript document. It must be uploaded as a separate file.

# BMJ Open

## A qualitative study of UK health professionals' experiences of working at the point of care during the COVID-19 pandemic

|                                 |                                                                                                                                                                                                        |
|---------------------------------|--------------------------------------------------------------------------------------------------------------------------------------------------------------------------------------------------------|
| Journal:                        | <i>BMJ Open</i>                                                                                                                                                                                        |
| Manuscript ID                   | bmjopen-2021-054377.R1                                                                                                                                                                                 |
| Article Type:                   | Original research                                                                                                                                                                                      |
| Date Submitted by the Author:   | 03-Aug-2021                                                                                                                                                                                            |
| Complete List of Authors:       | Baldwin, Sharin; University of Warwick, Warwick Clinical Trials Unit; London North West Healthcare NHS Trust<br>George, Joicy; University of West London, College of Nursing, Midwifery and Healthcare |
| <b>Primary Subject Heading</b>: | Health services research                                                                                                                                                                               |
| Secondary Subject Heading:      | Infectious diseases, Mental health, Nursing, Public health, Qualitative research                                                                                                                       |
| Keywords:                       | COVID-19, MENTAL HEALTH, PUBLIC HEALTH                                                                                                                                                                 |
|                                 |                                                                                                                                                                                                        |

SCHOLARONE™  
Manuscripts



I, the Submitting Author has the right to grant and does grant on behalf of all authors of the Work (as defined in the below author licence), an exclusive licence and/or a non-exclusive licence for contributions from authors who are: i) UK Crown employees; ii) where BMJ has agreed a CC-BY licence shall apply, and/or iii) in accordance with the terms applicable for US Federal Government officers or employees acting as part of their official duties; on a worldwide, perpetual, irrevocable, royalty-free basis to BMJ Publishing Group Ltd ("BMJ") its licensees and where the relevant Journal is co-owned by BMJ to the co-owners of the Journal, to publish the Work in this journal and any other BMJ products and to exploit all rights, as set out in our [licence](#).

The Submitting Author accepts and understands that any supply made under these terms is made by BMJ to the Submitting Author unless you are acting as an employee on behalf of your employer or a postgraduate student of an affiliated institution which is paying any applicable article publishing charge ("APC") for Open Access articles. Where the Submitting Author wishes to make the Work available on an Open Access basis (and intends to pay the relevant APC), the terms of reuse of such Open Access shall be governed by a Creative Commons licence – details of these licences and which [Creative Commons](#) licence will apply to this Work are set out in our licence referred to above.

Other than as permitted in any relevant BMJ Author's Self Archiving Policies, I confirm this Work has not been accepted for publication elsewhere, is not being considered for publication elsewhere and does not duplicate material already published. I confirm all authors consent to publication of this Work and authorise the granting of this licence.

1  
2  
3  
4  
5 **A qualitative study of UK health professionals' experiences**  
6 **of working at the point of care during the COVID-19**  
7 **pandemic**  
8  
9

10  
11 **Authors:**  
12

13 Sharin Baldwin<sup>1</sup>

14 Joicy George<sup>2</sup>  
15  
16  
17  
18  
19  
20  
21

22 <sup>1</sup>NIHR Clinical Research Fellow, University of Warwick/ Clinical Academic Lead  
23 (Nursing), London North West University Healthcare Trust, London, UK.  
24  
25

26 <sup>2</sup>Lecturer in Adult Nursing, University of West London, London, UK.  
27  
28  
29  
30  
31  
32  
33  
34  
35

36 **Corresponding author: Sharin Baldwin**

37 Address: 43 The Chase, Eastcote, Pinner HA5 1SH

38 Email: [sharin.baldwin@nhs.net](mailto:sharin.baldwin@nhs.net)

39 Telephone: 07956 581635  
40  
41  
42  
43  
44

45 **Key words:** COVID-19, nurses, doctors, allied health professionals, mental  
46 wellbeing.  
47  
48

49 **Word count:** 7687  
50  
51  
52  
53  
54  
55  
56  
57  
58  
59  
60



## ABSTRACT

**Objectives:** To develop an understanding of health professionals' experiences of working at the point of care during the COVID-19 pandemic, the impact on their health and wellbeing and their support needs.

**Design:** A qualitative study using semi-structured interviews. Data were analysed using Framework analysis.

**Setting:** One large National Health Service (NHS) integrated care trust.

**Participants:** A purposive sample of 19 qualified health professionals (doctors, nurses or allied health professionals), working with COVID-19 patients admitted to the hospitals between March – May 2020 were eligible to take part.

**Results:** Eight major categories were identified: 1) Working in a 'war zone', 2) 'Going into a war zone without a weapon', 3) 'Patients come first', 4) Impact of Covid-19, 5) Leadership and Management, 6) Support systems, 7) Health professionals' support needs, and 8) Camaraderie and Pride. Health professionals reported increased levels of stress, anxiety and a lack of sleep. They prioritised their patients' needs over their own and felt a professional obligation to be at work. A key finding was the reported camaraderie amongst the health professionals where they felt that they were 'fighting this war together'.

**Conclusions:** This study provides a valuable insight into the experiences of some of the frontline health professionals working in a large London based hospital trust during the first Covid-19 peak. Findings from this study could be used to inform how managers, leaders and organisations can better support their health professional staff during the current pandemic and beyond.

### Strengths and limitations of this study

- At the time when the study was undertaken little was known about UK frontline health professionals' experiences of working during the Covid-19 pandemic.
- A qualitative methodology enabled in-depth data collection about their needs and experiences.
- Use of framework analysis enabled data exploration while simultaneously maintaining an effective and transparent audit trail.
- Due to the qualitative nature, the study findings may not be representative of the experiences and views of all UK frontline health professionals but nonetheless it provides useful insights into their experiences.

## Background

Healthcare professionals have been at the forefront of dealing with the Covid-19 pandemic since March 2020. The virus initially spread rapidly in London compared to the rest of the country and placed an overwhelming demand on the National Health Service (NHS). Doctors, nurses and allied health professionals are at the forefront of the NHS, working under extremely difficult conditions during this pandemic and therefore likely to be at an increased risk of negative impacts to their health and wellbeing.

A quantitative study from China reported that frontline healthcare providers treating patients with COVID-19 had greater risks of mental health problems, such as anxiety, depression, insomnia, and stress [1]. Currently there is a longitudinal survey, the ICON study, underway in the UK led by the Royal College of Nursing Research Society Steering Group, in collaboration with a number of universities [2]. This survey is evaluating the impact of COVID-19 on the UK nursing and midwifery workforce at three time points: prior to COVID-19 peak, during the COVID-19 peak, and in the recovery period following COVID-19. The first survey of 2600 members of the nursing and midwifery workforce suggested that 74% felt their personal health was at risk, 92% were worried about risks to their family members due to their clinical role, and almost 33% reported severe or extremely severe depression [2].

The responses from this first survey highlighted the need to provide supportive interventions during and after COVID-19 to support individual's psychological and physical health needs. According to the project lead Dr Keith Couper, "urgent research is needed to develop and evaluate interventions to support individuals"[2].

A qualitative study of the experiences of healthcare providers in China suggested that nurses and physicians were challenged by working in a totally new context, and

1  
2  
3 reported exhaustion due to heavy workloads and protective gear, the fear of  
4  
5 becoming infected and infecting others, feeling powerless to handle patients'  
6  
7 conditions, and difficulty in managing relationships in this stressful situation [3]. At  
8  
9 the time when this study began there were no other qualitative studies undertaken or  
10  
11 published to inform how health professionals would like to be supported to maintain  
12  
13 and/or enhance their physical and mental health and wellbeing. NHS trusts across  
14  
15 the country are offering many wellbeing resources aimed at their staff, but it is not  
16  
17 known whether these are adequate to meet the needs of health professionals  
18  
19 working during the pandemic. This study was therefore designed to gain a better  
20  
21 understanding of frontline health professionals' experiences and highlight ways in  
22  
23 which doctors, nurses and allied health professionals want to be supported during  
24  
25 these extraordinary times. The findings from this study can help shape services to  
26  
27 provide better support to their health professionals during the Coronavirus pandemic  
28  
29 and any subsequent waves in the future.  
30  
31  
32  
33  
34  
35  
36  
37  
38

### 39 **Aims/ Objectives**

40  
41  
42 The aim of this study was to provide a broader understanding of the experiences and  
43  
44 needs of doctors, nurses and allied health professionals during and after the COVID-  
45  
46 19 outbreak, and how they could be better supported. There were three main  
47  
48 objectives, which were to gain a broader understanding of:  
49

- 50  
51 • frontline health professionals' experiences of working during the COVID-19  
52  
53 pandemic
- 54  
55 • the reported impact of this work on frontline health professionals' physical and  
56  
57 mental health, and  
58  
59  
60

- how doctors, nurses and allied health professionals could be better supported to promote/enhance their physical and mental wellbeing during and after COVID-19.

## **Methods**

A qualitative approach was used to address the study aims and objectives. Doctors, nurses and allied health professionals were recruited from three hospital sites across a large London based hospital Trust. Data from the Office for National Statistics showed that the borough in which the hospital is situated was the second most affected by the COVID-19 virus in London [4], therefore this trust was considered to be ideal for this study.

Any qualified doctor, nurse or allied health professional working with COVID-19 patients admitted to the hospitals between March – May 2020 were eligible to take part. Students, managers and those not providing direct patient care were excluded.

### ***Inclusion criteria***

- Qualified doctor, nurse or allied health professional
- Working during March – May 2020
- Providing direct patient care
- In one of the trust hospital sites

### ***Exclusion criteria***

- Student nurses/ student doctors/ student allied professionals
- Agency staff, not employed by the trust
- Managers

- Those not providing direct patient care
- Those not working during the period between March – May 2020

### ***Patients and public Involvement***

There was no patient involved in this study.

Three healthcare professionals were involved in guiding the planning and conduct of the study. Nurses contributed to the development of the study protocol. An independent clinical representative was involved in the data analysis process.

### ***Data Collection***

At the time of the study, both authors worked in the hospital trust where the study was undertaken. The study was advertised using posters at all hospital sites and those interested in taking part contacted the researchers. Participants were given a Participation Information Sheet and written informed consent (Appendix – 1) was obtained prior to participation. One-off in-depth qualitative interviews were conducted as per the study protocol which was developed prior to study commencement.

Interviews (including face-to-face and telephone) were conducted by both authors with a purposive sample of 19 health professionals meeting the inclusion criteria, until no new information was forthcoming and data saturation was reached. All interviews took place between July – October 2020. Both interviewers had prior experience of conducting qualitative interviews and a topic guide was developed to provide structure and focus (Appendix – 2), which was piloted during the first two interviews conducted by each author. The interviews were audio-recorded and transcribed using an approved transcription service. All interviews took place ensuring privacy, with no one else present apart from the participant and interviewer.

1  
2  
3 Participants were offered an opportunity to check their interview transcript for  
4 accuracy and provide feedback prior to analysis. The duration of the interviews  
5 varied between 15 and 60 minutes, with the average being 33 minutes. Field notes  
6 were written after each interview to record aspects of the interview that may not be  
7 captured on the recording such as environment, context, general observations and  
8 thoughts.  
9  
10  
11  
12  
13  
14  
15  
16  
17  
18

### 19 **Data Analysis**

20  
21 The research team consisted of the first author (SB), who undertook all aspects of  
22 this study, with support from the second author (JG) who was involved in developing  
23 the study protocol, study design, data collection and data analysis. None of the study  
24 participants worked in the authors' own teams. An independent clinical  
25 representative (who was not involved in the data collection process) was involved in  
26 the data analysis process for quality assurance and reduce any risk of bias. Data  
27 were analysed using thematic analysis informed by framework analysis and the five  
28 steps of data management: familiarisation; constructing an initial thematic  
29 framework; indexing and sorting; reviewing data extracts; and data summary and  
30 display, followed by a process of abstraction and interpretation [5, 6]. This method  
31 was chosen as it would enable the identifying, analysing and interpreting of patterns  
32 and meaning within qualitative data. Furthermore, this method is not tied to a  
33 particular epistemological or theoretical perspective, making it very flexible and  
34 appropriate for this study [7]. The computer software package NVivo (version 11)  
35 was used to facilitate this process.  
36  
37  
38  
39  
40  
41  
42  
43  
44  
45  
46  
47  
48  
49  
50  
51  
52  
53  
54  
55  
56  
57

58 During the familiarisation stage the interviews were listened to independently by both  
59 interviewers and the transcripts were read several times before initial themes were  
60

1  
2  
3 identified. These themes were discussed and checked against the interview topic  
4 guide and study objectives, resulting in the development of a set of preliminary  
5 codes (Figure 1). These initial codes were used to construct an initial thematic  
6 framework by grouping themes that linked particular items and sorting them  
7 accordingly to different levels of generality [6]. Through indexing and sorting, data  
8 were sorted into thematic sets, reviewed and organised by theme and by participant,  
9 into matrices before the data were reviewed and analysed to create the final  
10 categories and subcategories (Figure 1).  
11  
12  
13  
14  
15  
16  
17  
18  
19  
20  
21  
22  
23

### 24 **Study Rigour**

25  
26 'Trustworthiness' is central to ensuring quality of the study, which involves  
27 establishing credibility, dependability, transferability and confirmability.[8] These  
28 aspects were systematically considered during the study. To enhance credibility of  
29 the data, following interviews, participants were provided an opportunity to check  
30 their transcripts, data analytic categories, interpretations and conclusions. Feedback  
31 was obtained from participants to ensure that their views and experiences were  
32 accurately interpreted and represented, rather than being influenced by the  
33 researcher's own views and beliefs. The use of framework analysis enabled a step-  
34 by-step process for data management, which is transparent and replicable, thus,  
35 providing a clear audit trail and enhancing the dependability of the study findings.  
36  
37 The methods for this study have been described in detail to allow readers to make  
38 informed decisions about whether the findings can be transferred to another setting  
39 or context. Confirmability refers to the extent to which the findings of a study are  
40 shaped by the respondents and not researcher bias, motivation, or interest and is  
41 established when credibility, transferability, and dependability are all achieved.[8]  
42  
43  
44  
45  
46  
47  
48  
49  
50  
51  
52  
53  
54  
55  
56  
57  
58  
59  
60 Reflexive journals were kept throughout to document the researchers' personal



1  
2  
3 reflections of their values, interests, and insights. This was important in enabling the  
4  
5 researchers to acknowledge any potential risk of personal bias.  
6  
7  
8  
9

### 10 **Ethical Consideration**

11  
12 The study was conducted in compliance with the Research Governance Framework  
13  
14 for Health and Social Care and Good Clinical Practice. All interviews were carried  
15  
16 out on a voluntary basis and participants could withdraw from the study at any stage,  
17  
18 although none chose to do so. The interviews were transcribed with the principle of  
19  
20 anonymity in mind and a confidentiality agreement was in place for the approved  
21  
22 transcribing service used. Professional backgrounds of participants or the specific  
23  
24 site that they worked at have not been presented in the 'Participant Characteristics'  
25  
26 table to minimise the risk of individuals being identified due to the small sample size.  
27  
28  
29  
30  
31  
32

### 33 ***Ethics approval Statement***

34  
35 Health Research Authority and Health and Care Research Wales (HCRW) approval  
36  
37 was received for this study on 29 June 2020 (IRAS: 286213/ REC reference:  
38  
39 20/HRA/3206).  
40  
41  
42  
43  
44  
45  
46  
47  
48  
49  
50  
51  
52  
53  
54  
55  
56  
57  
58  
59  
60

## Results

### *Participant Characteristics*

Of the 19 participants, six were doctors, eight nurses and five allied health professionals (to include physiotherapists, speech & language therapists). There was representation from junior (clinicians with minimal management responsibilities) and senior members (clinical managers and leaders) of staff from each of these professional groups. Participants' ages ranged from 29 to 59 years, and over two thirds of the participants were female (n=13), with six being male. Nine described their ethnic background as White (English = 8, Irish = 1); seven as Asian (Indian= 5, Pakistani=1, Mauritian = 1); and three as Black (British = 1, Caribbean = 1, other = 1). All three hospital sites were represented in the sample. See table 1 for full participant characteristics.

Table 1: Participant characteristics

| No.        | Sex | Age   | Ethnicity        |
|------------|-----|-------|------------------|
| <b>P1</b>  | F   | 45-49 | White/ English   |
| <b>P2</b>  | F   | 25-29 | White/ English   |
| <b>P3</b>  | F   | 30-34 | Asian/ Indian    |
| <b>P4</b>  | M   | 30-34 | Asian/ Indian    |
| <b>P5</b>  | F   | 40-44 | White/ English   |
| <b>P6</b>  | F   | 55-59 | White/ English   |
| <b>P7</b>  | M   | 25-29 | Asian/ Indian    |
| <b>P8</b>  | F   | 30-34 | White/ English   |
| <b>P9</b>  | M   | 30-34 | Asian/ Indian    |
| <b>P10</b> | M   | 30-34 | White/ English   |
| <b>P11</b> | F   | 40-44 | Black/ Caribbean |

|            |   |       |                  |
|------------|---|-------|------------------|
| <b>P12</b> | M | 30-34 | Asian/ Mauritian |
| <b>P13</b> | F | 45-49 | White/ English   |
| <b>P14</b> | F | 25-29 | Asian/ Indian    |
| <b>P15</b> | F | 30-34 | White/ Irish     |
| <b>P16</b> | M | 25-29 | Asian/ Pakistani |
| <b>P17</b> | F | 35-39 | White/ English   |
| <b>P18</b> | F | 35-39 | Black British    |
| <b>P19</b> | F | 45-49 | Black Other      |

Eight major categories (and subcategories) pertaining to frontline health professionals' experiences, impact and needs were identified from the data:

1. Working in a 'war zone'
2. 'Going into a war zone without a weapon'
3. 'Patients come first'
4. Impact of Covid-19
5. Leadership & Management
  - Communication, Care and Compassion
  - 'There was them and us'
6. Support systems
7. Health professionals' support needs
  - Acknowledgement, Praise and Recognition
  - De-briefing and psychological support
  - Better Information, Communication and Leadership
  - Adequate staff facilities
8. Camaraderie and Pride: 'we are in it together'

## 1. Working in a 'war zone'

Health professionals described their experience as working in a 'war zone'. They talked about the enormity of it as *"it was like that scene on ET, all that plastic..... So, there's all this plastic and, I get it, but just walking into this other world, there was just mayhem, pandemonium. People running around, alarms going off..... it was like a war zone. That's how everyone equated it to, that the rules had completely changed, absolutely changed."* (P1)

It was something that they had never experienced before or even anticipated and described it as an 'out of world' experience which they were not prepared for: *"....you are like an astronaut going to some special mission, like you are going inside a special room, something like that. And it was really tough, in fact, there were like so many sick patients, so many young sick patients coming, plus the older sick patients."* (P4)

Health professionals talked about the fear they felt coming into work, they described it as being *"absolutely terrifying"*, *"pure fear, pure anxiety, of death"* (P1), and that *"the mental fear was something awful"* (P3).

*"I remember walking into the ward and just this feeling of dread of like, "OK. I don't really want to be here, but I know that I've just got to get on and do it.""* (P13)

Some also described feeling confused, angry and frustrated with the speed in which everything progressed, resulting in additional demands placed on staff.

## 2. 'Going into a war zone without a weapon'

Personal safety and the lack of adequate Personal Protective Equipment (PPE) featured strongly in the interviews, leaving health professionals feeling disappointed, frustrated and angry about not being adequately protected. Many compared it to being in a war zone without a weapon.

*"It's like a basic right to be protected. Like, this is a war. You wouldn't send soldiers out without any....weapons... equipment and armour and guns, that kind of stuff. Like, you have to be protected"* (P2)

*"... police officers don't go out without a stab vest, firemen don't go out without wearing the full protective gear ... why are healthcare staff any different? Why are we not provided with the appropriate [PPE]"* (P12)

*"It was like I'm going to the war zone and I've got no weapon. Where is my weapon?"* (P11)

The shortage of PPE meant that health professionals avoided discarding their masks or taking adequate breaks due to the fear of their PPE not being replaced:

*"Well, I need to go out to the loo, and I better not because there might not be PPE to be able to get back in. So, I better hang on, or do I really need my break. Maybe I won't have my break." So, that was difficult"* (P6)

Health professionals recognised the national PPE guidance was constantly changing, and although this was frustrating they wanted *"... more support from the trust, needed to be updated, needed, and I think more help and guidance on like the PPE I think was a big issue. Because one week you had to wear full gown, full*

1  
2  
3 *apron, the whole shebang, and then the next week no you didn't.....There were all*  
4  
5 *these changes which was affecting all of us” (P8)*  
6  
7  
8  
9

### 10 11 12 **3. ‘Patients come first’** 13

14  
15 There was a strong sense of professional duty amongst the health professionals,  
16  
17 where they prioritised their patients’ needs before their own. This was common  
18  
19 amongst all three professional groups.  
20

21  
22  
23 *“I felt that, as a nurse, it’s my duty and it’s my responsibility to be for the patient any*  
24  
25 *time, no matter what comes” (P4)*  
26

27  
28 *“I think as health professionals I think it’s something we’re good at. People have a*  
29  
30 *sense of duty; they want to help. That’s why they’re there” (P10)*  
31

32  
33  
34 *“I think as a medical professional it is always very much you look after everybody*  
35  
36 *else and your attitude is always, “Yes, I’m fine. Yes, I’m fine. Yes, I’m fine. Yes, I’m*  
37  
38 *fine.” Even if you’re not fine...” (P13)*  
39

40  
41 Nurses described as being adaptable and having to take on multiple roles for their  
42  
43 patients, *“to be a carer, they had to be a comforter; they had to be an advisor, a*  
44  
45 *counsellor to the families. At the same time, to be a nurse” (P4)*  
46

47  
48  
49 Some talked about the change in public perception of healthcare professional during  
50  
51 the pandemic and found being called ‘Heroes’ and being clapped for an  
52  
53 uncomfortable experience, when they were simply fulfilling their duties:  
54

55  
56  
57 *“.....with the whole clapping and just how the government sort of dealt with things. I*  
58  
59 *just felt it was really embarrassing” (P9)*  
60

1  
2  
3 *“I think as a doctor you – or as a nurse, or actually anybody in health, it’s, “Oh, you*  
4 *work for the NHS,” and it’s so taken for granted, and just that change of feeling of the*  
5 *country of, “The NHS has to save us,” and suddenly you’re sort of put up as these*  
6 *amazing people that do all of these incredible things, and you think, “Well, I’m just*  
7 *doing what I always do.”” (P13)*

#### 4. Impact of Covid-19

20  
21 Working during the pandemic had a negative impact on most participants. Some  
22 talked about contracting Covid-19 and the symptoms associated with the infection,  
23 while many talked about the exhaustion and tiredness of working during this  
24 demanding period and the impact on their mental health:

25  
26  
27  
28  
29  
30  
31 *“I actually don’t think I’ve really experienced anxiety to this level that I had at the*  
32 *beginning of this pandemic” (P9)*

33  
34  
35  
36  
37 *“I remember one day I finished my shift, outside, my car, and I cried in the car park”*  
38  
39 (P18)

40  
41  
42 Participants talked not being able to sleep due to the increased levels of anxiety at  
43 work and how that impacted on their physical and mental health:

44  
45  
46  
47 *“So there was a lot of unhealthy eating and kind of not sleeping at the same time,*  
48 *stress levels were quite high, anxiety was quite high. So that did have an impact, and*  
49 *I’m sure this had impacted on my blood pressure, worsened my cardiovascular risk*  
50 *... but I’ve not formally measured it” (P12)*

51  
52  
53  
54  
55  
56  
57 *“...from the beginning of it, I wasn’t sleeping. I’d done three weeks of long days, and*  
58 *I wasn’t sleeping. And it was really affecting me. Everything was affecting me. And I*

1  
2  
3 ended up having PTSD, it was diagnosed as. So, I ended up being really anxious”

4  
5 (P1)

6  
7  
8 Having to come into work also had a negative impact on participants’ family  
9  
10 members which often added to their existing anxieties. They talked about family  
11  
12 members being distressed and worried about their safety.  
13  
14  
15

## 16 17 18 19 **5. Leadership & Management**

### 20 21 **Communication, Care and Compassion**

22  
23 Health professionals described varying experiences relating to leadership and  
24  
25 management. In areas where there was good communication and support, it resulted  
26  
27 in positive experiences, as reflected below:  
28  
29

30  
31 *“..my manager always used to come around and have a look around us, make sure  
32  
33 that those who are on work were well taken care of. Come and chat with us, ask us  
34  
35 how is everything, is everything OK, and then to support in that time, like we had”*

36  
37 (P4)

38  
39  
40 *“We had quite clear leadership and ... although information was changing, we were  
41  
42 told why it was changing, what was going on, we understood the changes to the  
43  
44 department physically, we understood as we became more aware of what the  
45  
46 patients were presenting like, a better idea of what to do next with them” (P17)*

47  
48  
49  
50  
51 Many however felt that they were not treated with care or compassion by their senior  
52  
53 managers, as a redeployed nurse, speaking about the nurse in charge stated: *“Not a  
54  
55 word of appreciation, not a word of thank you, and she didn’t just ask me, “Are you  
56  
57 OK? Can you go home? Are you OK to handover?” Nothing. She just stood at the  
58  
59 door and she waved her hand [good-bye]” (P3)*  
60



1  
2  
3 Similar feelings were expressed by medical staff where one felt “...doctors were  
4 *being treated numbers once again, and healthcare just being treated like numbers*”  
5  
6  
7 (P9). This health professional went on to say “*I generally don’t think the working*  
8  
9 *environment for NHS is that well supported, just generally, despite COVID. That’s*  
10  
11 *just personally how I feel. I feel like medicine as an institution there still exists a lot of*  
12  
13 *bullying, there still exists a lot of competitive natures, like cutthroat, which is part of*  
14  
15 *the process*” (P9)

16  
17  
18  
19  
20 Some felt that they were not being listened to and compassion was lacking from their  
21  
22 managers “...*I felt like I was being patronised.....I thought it was forced, but I felt our*  
23  
24 *voice as staff was not heard.....our needs was not met.....Compassion was not*  
25  
26 *shown.....Caring was not shown, and that did not sit well with me because we are a*  
27  
28 *nursing profession and our role is to show compassion and caring*” (P11).

### 31 32 33 34 35 **‘There was them and us’**

36  
37  
38  
39 There was a general feeling amongst most junior health professionals that there was  
40  
41 a hierarchical management system where the senior manager/leaders were less  
42  
43 visible at the frontline during the pandemic:

44  
45  
46 “*You didn’t really see much of a physical presence of anyone from the higher*  
47  
48 *management that were on the shop floor telling you, “Well done”, or “Thank you for*  
49  
50 *what you’re doing.” So that I didn’t feel that we were supported from the kind of*  
51  
52 *higher-up management*” (P12)

53  
54  
55  
56 “*I have never seen any of the management people in the PPE to come in and to see*  
57  
58 *what happens*” (P3)

1  
2  
3 The lack of communication between senior and junior staff seems to play a big part  
4  
5 in staff feeling this divide:  
6  
7

8  
9 *“The Band 8s [managerial/ leadership role] have been involved in various meetings,*  
10  
11 *and they’ve been involved with things or making decisions that we’ve felt that they*  
12  
13 *could have, “Can we just share your experience?” they’ve not really shared our*  
14  
15 *experience and they sometimes make some sweeping statements of what we’re*  
16  
17 *going to do and how we’re going to change. It would have been nice if they could*  
18  
19 *have talked to us” (P6)*  
20  
21

22  
23 *“Decisions were made where I was working, and it can be a bit hierarchical at times.*  
24  
25 *I think communication around the decisions was often a bit convoluted....” (P10)*  
26  
27  
28  
29  
30

## 31 **6. Support systems**

32  
33 Most health professionals were aware of a range of support services provided by the  
34  
35 organisation. They particularly valued the regular ‘Communication’ emails and the  
36  
37 information available on the Trust intranet. Most also mention the support on offer  
38  
39 from the psychology team and some had accessed this service. Some however  
40  
41 talked about the difficulties associated with being able to access the services on  
42  
43 offer: *“I know there is some, but if I’m honest I’m not exactly sure how I would go*  
44  
45 *about going into it. I know during the pandemic they were putting on some things, but*  
46  
47 *unfortunately they were often like at times when I was in working or on shift or*  
48  
49 *something. So, I wasn’t able to get along.” (P10)*  
50  
51  
52  
53

54  
55 Most staff, however, accessed support from their team members and work  
56  
57 colleagues, and found this to be beneficial:  
58  
59  
60

1  
2  
3 *“... work colleagues would try and support each other. There was a bit of a more*  
4 *team ethos. So that helped with coping with the stress, and just ... bounce some of*  
5 *the issues that we had with each other” (P12)*  
6  
7  
8  
9

10 Support from friends and family also played an important role in helping health  
11 professionals deal with their stress and anxieties.  
12  
13  
14  
15  
16  
17  
18

## 19 **7. Health professionals’ support needs**

### 21 ***Acknowledgement, Praise and Recognition***

22  
23  
24  
25 Participants wanted to feel valued by being acknowledged, recognised and praised  
26 by senior leaders and managers for the work that they were doing during this difficult  
27 time. They wanted this to be a personalised approach rather than a generic one:  
28  
29  
30  
31

32  
33 *“I think recognition of the team’s effort by the trust, not a generic e-mail or a thank-*  
34 *you that gets sent, but ... somebody from senior management actually coming down*  
35 *and saying to people on the shop floor, “Well done for what you’ve done, and thank*  
36 *you for what you’ve done.” I know it’s part of our job, but sometimes you do feel*  
37 *undervalued .... by the trust in terms of how things are” (P12)*  
38  
39  
40  
41  
42  
43  
44  
45  
46  
47  
48

### 49 ***De-briefing and psychological support***

50  
51 Health professionals wanted opportunities to debrief and to have access to  
52 psychological support. Having this support available locally in their own work  
53 settings/ departments was thought to be more appropriate in encouraging staff to  
54 access it more readily:  
55  
56  
57  
58  
59  
60

1  
2  
3 *"...if there was someone like to come to us when we are in the clinical setup, if there*  
4 *is someone to come to us and to speak to us, like during our breaks"* (P3)  
5  
6  
7

8 *"Whereas I do think sometimes if there's a person or a presence of someone to*  
9 *come, and you can kind of put a face to it, that, for me personally, makes it more*  
10 *relatable and perhaps less intimidating to go and have these conversations or join*  
11 *these classes and things that you want to do"* (P10)  
12  
13  
14  
15  
16

17  
18 Some suggested having protected time would enable staff to collectively reflect on  
19 their experiences, debrief, and share learning while also focusing on the positive  
20 outcomes:  
21  
22  
23

24  
25  
26 *"...also focussing on the positives. Like, the positive case studies. So, somebody*  
27 *that came in and they're treatment from beginning to end"* (P2)  
28  
29

30  
31 *"I think it would be really nice to get together and have a sort of, like, you know, be*  
32 *reflective, talk about what we didn't enjoy, well what went wrong, how we can*  
33 *improve. Because if there was to be a second wave again, then we can learn from it*  
34 *and put those ideas forward"* (P8)  
35  
36  
37  
38  
39  
40  
41  
42  
43  
44

### 45 **Better Information, Communication and Leadership**

46  
47

48 Health professionals wanted improved communication from managers and leaders  
49 and this to be provided locally, face-to-face rather than through emails:  
50  
51

52  
53 *"I just think we just need more support and just to be updated, to be told what's*  
54 *happening. I know we're getting the regular emails, but specifically to our ward,*  
55 *what's happening [ward], and having like maybe a weekly meeting or something too"*  
56  
57  
58  
59  
60 (P8)

1  
2  
3 *“..perhaps having someone come to where you work to explain exactly what’s*  
4 *available”* (P10)  
5  
6  
7

8 Junior health professionals wanted to be informed and involved in the decision  
9 making process around issues that affected them, one person stated: *“The only thing*  
10 *I would love to happen is most probably, is for the Trust to support probably – to*  
11 *incorporate the lower grade staff in their decision making”* (P11)  
12  
13  
14  
15  
16  
17

18 The need for improved leadership through having a senior health professional  
19 oversee the team or department was seen as being important. A nurse who was  
20 redeployed to another area of work stated: *“I should say there should be someone to*  
21 *overlook, like it will be great, if we are deployed, if we get a person, like a specific*  
22 *person ‘this many group of people can speak to this person specially and that person*  
23 *is available at the clinical centre’.... If there is a specific person like that, like we can*  
24 *share our concerns and issues”* (P3)  
25  
26  
27  
28  
29  
30  
31  
32  
33  
34

35 The overall feeling was that *“there could have been more leadership from the seniors*  
36 *to create an environment that was like, you know, “If you don’t feel like you should be*  
37 *working, please come and see us, or please to go occupational health,” or maybe*  
38 *there should have been more emails given by occupational health to see if we were*  
39 *suitable to work.”* (P9)  
40  
41  
42  
43  
44  
45  
46  
47

48 More involvement from managers and working together with health professionals at  
49 the frontline was viewed as being necessary to being an effective leader: *“I would*  
50 *suggest is, managers take front line if it happens again, because that in itself will*  
51 *prevent your staff from calling sick. That in itself will motivate your staff from getting*  
52 *up in the morning, from coming to work. I know we have managers things to do, but*  
53 *just for two days, you can do it for days”* (P11)  
54  
55  
56  
57  
58  
59  
60

### **Adequate staff facilities**

As health professionals working on the frontline, participants wanted their basic needs to be met. They wanted to have access to adequate clothing (scrubs), PPE and facilities for changing, showering and resting, as reflected below:

*“I would like a simple thing, like we have a space to just relax or like we have some time off.....So I just feel like if we have some kind of a small, like an entertainment or a relaxing zone anywhere in our hospitals where staff can sit down and relax.....Like it could be anything, like we have a refreshing zone or like we have a small gaming zone or like we have a small sofa, a two-seater relaxing sofa. Or we have some Internet facility or like we have books to read or anything of that kind of a zone” (P4)*

*“more importantly, an area where I could leave my clothes and my shoes, change into scrubs and shoes and then, at the end of my shift, have an area again where I can take away my dirty clothes, maybe have a shower, clean myself, sanitise myself, put on my clean clothes and go back out.” (P12)*

Overall health professionals felt it was *“important to make sure everything is put in place, all the PPEs, all the right gears are put in place” (P19)*

### **8. Camaraderie and Pride: ‘we are in it together’**

Working during the pandemic brought about a sense of camaraderie amongst the health professionals, which was seen as a positive aspect.

Participants’ comments included:

1  
2  
3 *"We've got closer. There's just a camaraderie.... it's that kind of thing, like we've all*  
4 *been through it, and ... no, not with my colleagues. If anything, it's affected it for the*  
5 *better"* (P1)  
6  
7

8  
9  
10  
11 *"I feel like there's a community within nursing, and then there was a community*  
12 *within caring for people with COVID, because it was such a like exceptional*  
13 *circumstance and then everyone was in it together, and it was so horrible that I feel*  
14 *like we had a – I almost feel like we had a mutual understanding of each other and a*  
15 *mutual respect"* (P2)  
16  
17  
18  
19  
20  
21

22  
23 *"They were all together working as nurses for a single goal – treat COVID-19*  
24 *patients"* (P4)  
25  
26  
27

28 This camaraderie was felt amongst all three professional groups, and health  
29 professionals reported working together across professional boundaries, breaking  
30 some of the traditional practices, as demonstrated in the following statements:  
31  
32  
33

34  
35  
36 *"I think it was one of the positives from the whole thing was the camaraderie I felt*  
37 *with other people on the unit where I work. ....so, where we were, we weren't able to*  
38 *do certain things as therapists, so we were doing a lot of nursing shifts instead, and it*  
39 *was sort of a real roll your sleeve up and muck in"* (P10)  
40  
41  
42  
43  
44  
45

46 *"...on the shop floor we supported one another. That was very ... there was that*  
47 *team ethos, ..... if I had gone into the bay, and a patient had requested to use a*  
48 *commode, for example, instead of me calling for a nurse or for a HCA to give the*  
49 *commode, because I'm already there in the bay, I would take the commode and tend*  
50 *to the patient ..."* (P12)  
51  
52  
53  
54  
55  
56  
57  
58  
59  
60

1  
2  
3 *“... there was a lot more camaraderie..... we got to know colleagues from around the*  
4 *rest of the hospital, and we were suddenly just all pulling together, whereas before,*  
5 *there would be the usual tensions.....All that had gone, really, we were all trying to*  
6 *work together” (P17)*  
7  
8  
9  
10  
11

12  
13 In addition, health professionals felt a sense of pride in being able to contribute to  
14 this crisis and as a result better prepared to take on such challenges in the future.

15  
16 One clinician stated: *“I think what we had was the worst and still we managed it, so*  
17 *we have that experience in our hand, that will help us” (P7)*  
18  
19  
20  
21  
22

23  
24 Another said, *“I think it’s made us stronger really, because we worked well as a*  
25 *team. So, we’ve overcome like many challenges, and we have, you know, to say that*  
26 *I was a nurse on the front line is, not to say it’s an accomplishment, but you’re never*  
27 *going to forget that” (P8)*  
28  
29  
30  
31  
32

33  
34 Seeing the speed in which changes were made within the healthcare setting was  
35 another positive aspect, as reflected below:  
36  
37

38  
39 *“I think it was interesting seeing, actually, when there was a massive crisis like this*  
40 *how within health how actually things could change so quickly. So, there’s often so*  
41 *much inertia, months and months go by, decisions aren’t made, “You can’t do this.*  
42 *No we can’t do that. No we’ve never done it like this, so we can’t do that,” and*  
43 *actually it was quite enlightening to see that actually when things need to change*  
44 *and they need to change quickly, they did. And there were huge changes within the*  
45 *Trust, moving wards, increasing intensive care beds, mobilisation of staff, everybody*  
46 *doing different roles, and that for me was brilliant to see, that actually it can happen”*  
47 *(P13).*  
48  
49  
50  
51  
52  
53  
54  
55  
56  
57  
58  
59  
60



## Discussion

Frontline health professionals in this study compared their experience of working during the first wave of the Covid-19 pandemic to working in a war zone. The analogy used could be explained by the unprecedented situation they found themselves in, having to balance the needs of their own families against the demand of their jobs. Most were fearful of coming to work after witnessing high volumes of deaths caused by the virus. The situation was made worse by the lack of adequate PPE available to them, resulting in health professionals feeling disappointed, frustrated and angry. Again, health professionals compared the situation to being in a *war zone without a weapon*. At the time, a similar picture was seen across the UK with reports of inadequate provisions of PPE [2, 9], as well as inadequate COVID-19 testing for healthcare staff [10] and unclear infection control policies in some healthcare settings [11]. Maben and Bridges posit that the failure to protect nursing staff adequately could result in anger and frustration, leading to many leaving the profession [12]. This could also apply to doctors and allied health professionals working in such conditions.

Most health professionals in the current study reported increased levels of stress, anxiety and a lack of sleep. This is hardly surprising as evidence from studies on previous outbreaks of emerging viruses (including SARS, covid-19, MERS, Ebola and influenza) suggest that up to a third of staff will experience high levels of distress [13]. Healthcare workers in countries that experienced the peak of Covid-19 infection earlier than the UK were more likely to experience symptoms of anxiety and depression than before the pandemic [14]. Reports of stress, anxiety, depression and insomnia in health professionals working on the frontline during Covid has also been reported in other studies carried out in the UK [5] and internationally [15, 16,

1  
2  
3 17, 18, 19]. In a survey of 996 health and social care staff (75% of whom were  
4 employed by the NHS) by the Institute for Public Policy Research, 50% reported that  
5 their mental health had declined during the first two months of the pandemic [20]. In  
6 another survey of 921 allied health professionals, 86% reported feeling stressed with  
7 regards to changes in their work environment and transmission of the virus [21].  
8 Interestingly in this study, levels of stress were dependent upon access to PPE and  
9 mental health resources [21]. Similarly in other surveys, 45% of doctors reported  
10 experiencing depression, anxiety, stress, burn-out or other mental health conditions  
11 related to the outbreak (undertaken in May 2020),[9], and 33% of nurses and  
12 midwives reported severe or extremely severe depression, anxiety or stress  
13 (undertaken in April 2020),[2]. Additionally six months into the pandemic, 76% of  
14 almost 42,000 nurses surveyed by the Royal College of Nursing (RCN) reported an  
15 increase in their stress levels since the advent of the pandemic, with 52% concerned  
16 about their mental health [10].

17  
18  
19  
20  
21  
22  
23  
24  
25  
26  
27  
28  
29  
30  
31  
32  
33  
34  
35  
36 Frontline health professionals' mental health needs to be adequately supported  
37 especially as this is a workforce that was already experiencing high levels of stress  
38 prior to the pandemic. In the decade preceding the onset of the pandemic, symptoms  
39 of anxiety and depression were reported in between 17 to 52% of doctors [22], with  
40 potentially higher levels among nurses [23]. There is a well evidenced link between  
41 staff wellbeing and quality of care delivery. The World Health Organization (WHO)  
42 has recently highlighted that 'keeping all staff protected from chronic stress and poor  
43 mental health during this response means that they will have a better capacity to fulfil  
44 their roles' [24]. Conversely, without good mental health or psychosocial support for  
45 health professionals there is a risk to the quality of care delivered to their patients  
46 [25]. Focusing on the health and wellbeing of nursing staff is essential to the quality  
47  
48  
49  
50  
51  
52  
53  
54  
55  
56  
57  
58  
59  
60

1  
2  
3 of care provided as it affects an individual's level of compassion, professionalism and  
4  
5 effectiveness [26].  
6  
7  
8  
9

10 Healthcare professionals are often reported to be good at coping and have a strong  
11  
12 belief that they should be able to deal with anything that comes along in their  
13  
14 personal or professional domain [27]. This was evident amongst the health  
15  
16 professionals in this study where they prioritised the needs of their patients over their  
17  
18 own and felt a professional obligation to be at work. This can often generate a  
19  
20 superhuman philosophy that makes it difficult for healthcare professionals to admit  
21  
22 that they are experiencing stress [27], a trait that was also seen amongst the  
23  
24 participants in this study. This may have implications for how these health  
25  
26 professionals are supported during such difficult times.  
27  
28  
29  
30  
31  
32

33 In this study, most health professionals were aware of the services available to them  
34  
35 through their organisation, including support from psychological services. However  
36  
37 they wanted a more personalised approach to dissemination of information through  
38  
39 face-to-face contacts and debriefs. Health professionals reported good levels of  
40  
41 support from their work colleagues and family members, but a 'disconnect' between  
42  
43 junior and senior staff. Interestingly, Maben and Bridges reported findings from  
44  
45 studies of members of the armed forces where team cohesion was noted horizontally  
46  
47 (between colleagues) and vertically (between leaders and their teams) [12]. This was  
48  
49 also highly correlated with mental health, with a reported 10-fold difference in  
50  
51 trauma-related mental health status between troops who perceived themselves as  
52  
53 having a good or bad leader [28]. In the current study, where there was good  
54  
55 communication and staff felt supported, they reported good leadership. A lack of  
56  
57 communication, care and compassion was associated with a divide between  
58  
59  
60

1  
2  
3 managers and junior health professionals. Therefore there are a number of things that  
4  
5 managers and leaders could do to improve staff wellbeing. This includes being  
6  
7 visible and approachable and inviting feedback from team members; communicating  
8  
9 regularly in a honest and open manner, acknowledging team members' contributions  
10  
11 and providing praise; and prioritising wellbeing, mandating breaks and creating  
12  
13 opportunities for teams to meet together [12, 29, 30, 31]. There may have been  
14  
15 legitimate reasons for senior managers and leaders not being visible during this  
16  
17 study as they were also faced with this unprecedented situation, having to make  
18  
19 changes based on the rapidly changing national guidance, however if this was  
20  
21 communicated to the frontline staff then that may have reduced the 'divide' felt by  
22  
23 participants between junior and senior staff. It is also important that senior health  
24  
25 professionals seek support for themselves, so that they have the capacity to support  
26  
27 others and are able to role model good self-care [12]. Health professionals in this  
28  
29 study highlighted a need for access to psychological therapies and opportunities for  
30  
31 reflective space to enable them to think about their experiences and process their  
32  
33 emotions.  
34  
35  
36  
37  
38  
39  
40  
41

42 Another important need identified by the health professionals was the lack of  
43  
44 adequate facilities within their workplace for breaks, rest, showering, dressing or  
45  
46 storing personal belongings. Referring to Maslow's hierarchy of needs, physiological  
47  
48 and safety needs are the first two levels which must be met before individuals can be  
49  
50 motivated and turn their attention toward others [32]. Therefore, it is fundamental that  
51  
52 health professionals' basic needs are prioritised by ensuring the availability of  
53  
54 adequate facilities to meet their physiological needs, as well as access to adequate  
55  
56 protective equipment to meet their safety needs, as discussed previously. This has  
57  
58 also been highlighted by other researchers [33, 34].  
59  
60

1  
2  
3  
4  
5 A positive aspect of this study was the camaraderie seen across the frontline health  
6 professionals. The pandemic has created a special professional bond amongst the  
7 staff where they felt that they were *fighting this war* together. In the military, bonds  
8 between team members has been reported to build resilience amongst troops [35],  
9 which echoes the messages from the participants in this study. Health professionals  
10 working together across professional boundaries, is a welcomed move which will  
11 hopefully continue beyond the Covid-19 pandemic, resulting in more collaborative  
12 working amongst nurses, doctors and allied health professionals.  
13  
14  
15  
16  
17  
18  
19  
20  
21  
22  
23  
24  
25

26 It is acknowledged that due to the qualitative nature of this study and the small  
27 sample size, the study findings may not be representative of the experiences and  
28 views of all frontline health professionals within the organisation. Study limitations  
29 also included that only volunteer frontline health professionals participated, which  
30 may have resulted in recruiting those who were specifically interested in the topic  
31 area. Also only nurses, doctors and allied health professionals working within the  
32 acute setting were included. It is recognised that health professionals from other  
33 groups (such as midwives, healthcare assistants, students etc.) and settings  
34 (community, clinics, primary care etc.) may have similar experiences, which were not  
35 captured in this study and would benefit from being included in future studies. This  
36 study however provides a valuable insight into the experiences of some of the  
37 frontline health professionals working in a large London based hospital trust during  
38 the first Covid-19 peak. Findings from this study could be used to inform how  
39 managers, leaders and organisations can better support their clinical staff during the  
40 current pandemic and beyond. Health professionals who are better supported in  
41 practice give better care to patients, increasing staff engagement and improving  
42  
43  
44  
45  
46  
47  
48  
49  
50  
51  
52  
53  
54  
55  
56  
57  
58  
59  
60

1  
2  
3 retention rates [36]. Being able to better support the needs of the clinical workforce  
4  
5 could therefore also contribute to better patient care and improved retention of  
6  
7 clinical staff during and after this pandemic.  
8  
9  
10  
11  
12  
13

### 14 **Implications for practice:**

15  
16 There are a number of recommendations for individuals, managers/leaders and  
17  
18 organisations to improve the health and wellbeing of frontline health professionals.  
19  
20  
21  
22

#### 23 ***Individuals***

24  
25 Health professionals need to look after themselves by taking regular breaks, keeping  
26  
27 hydrated and eating well. It is important to be aware of the support services available  
28  
29 and utilise them when necessary. Asking for help when not coping should not be  
30  
31 seen as a weakness. It is also important to feel proud of individual achievements and  
32  
33 celebrate them. Individuals can also look out for their colleagues and offer them  
34  
35 support if they need it (including, talking, signposting them to supportive resources,  
36  
37 promoting their wellbeing).  
38  
39  
40  
41  
42  
43

#### 44 ***Managers/Leaders***

45  
46 Managers and leaders need to look after themselves too, so that they have the  
47  
48 capacity to support others and role model good self-care. Being visible,  
49  
50 approachable and available during a crisis can convey care and compassion to  
51  
52 junior staff and other team members. It is important to maintain regular honest and  
53  
54 open communication with team members, creating opportunities for debriefing and  
55  
56 inviting feedback. Involving team members in decision making processes,  
57  
58 acknowledging their contributions and providing regular praise can help staff feel  
59  
60

1  
2  
3 more supported. Prioritising staff wellbeing, mandating breaks and creating access  
4 to adequate facilities (such as rest areas, showering and changing facilities etc) are  
5  
6 essential to ensuring staff wellbeing. It is crucial that those in managerial and  
7  
8 leadership roles are aware of all available support services so that they can utilise  
9  
10 them and signpost others to as necessary.  
11  
12  
13  
14  
15  
16

### 17 **Organisations**

18  
19 Providing adequate food, drink, rest facilities; staff safety and ensuring that staff do  
20 not exceed safe working hours should be a priority for all healthcare organisations.  
21  
22 Organisations should proactively address resource inequities and provide regular  
23  
24 situational updates for all staff, including realistic and frank information about risk  
25  
26 and adverse events. It is important to provide regular praise and acknowledgement  
27  
28 to increase staff morale. Organisations should support all managers and leaders to  
29  
30 develop their skills to support their teams, such as debriefing practices, identifying  
31  
32 psychological distress, and the promotion of mental health and wellbeing. Access to  
33  
34 adequate psychological support should be offered. Good communication at all levels  
35  
36 is essential so that junior staff are given opportunities to voice their concerns and be  
37  
38 heard. Where possible information should be disseminated using personalised  
39  
40 approaches, through forums, meetings and regular briefings as well as other formal  
41  
42 methods (emails, newsletters etc).  
43  
44  
45  
46  
47  
48  
49  
50  
51  
52  
53  
54  
55  
56  
57  
58  
59  
60

1  
2  
3 **Acknowledgements:** We would like to thank all the health professionals who took  
4 part in this study, for sharing their views and personal experiences during these  
5  
6 part in this study, for sharing their views and personal experiences during these  
7  
8 difficult times, without which this study would not have been possible. We would also  
9  
10 like to thank the NHS trust for supporting this study to be undertaken. This study was  
11  
12 carried out during the first wave of the Covid-19 pandemic when everyone  
13  
14 throughout the NHS was faced with this unprecedented situation. Since then a  
15  
16 Health & Wellbeing strategy has been developed and many wellbeing initiatives have  
17  
18 been implemented in the trust where the study was undertaken.  
19  
20  
21  
22  
23

### 24 **Contributors**

25  
26 SB and JG developed and designed the research proposal, negotiated access to the  
27  
28 study-site, obtained the required approvals, recruited participants, conducted the  
29  
30 interviews, undertook the data analysis. SB wrote the first draft of this paper. JG  
31  
32 commented on the draft manuscripts and contributed to the final version of the  
33  
34 paper.  
35  
36  
37  
38  
39

40 **Competing interests:** None declared  
41  
42  
43

44 **Funding:** No external funding was received for this study.  
45  
46  
47  
48

49 **Data sharing statement:** Selected anonymised qualitative data from the interviews  
50  
51 could be made available on request.  
52  
53  
54  
55  
56  
57  
58  
59  
60



## References

1. Liu, Q., Luo, D., Haase, J.E., Guo, Q., Wang, X.Q., Liu, S., Xia, L., Liu, Z., Yang, J., Yang, B.X. (2020a) The experiences of health-care providers during the COVID-19 crisis in China: a qualitative study. *Lancet Global*, [https://doi.org/10.1016/S2214-109X\(20\)30204-7](https://doi.org/10.1016/S2214-109X(20)30204-7)
2. University of Warwick (2020) Survey of UK nurses and midwives' highlights their concerns about health, training and workload during COVID-19. [https://warwick.ac.uk/newsandevents/pressreleases/survey\\_of\\_uk](https://warwick.ac.uk/newsandevents/pressreleases/survey_of_uk) (accessed 21 May 2020)
3. Liu, S., Yang, L., Zhang, C., Xiang, Y.T., Liu, Z., Hu, S., Zhang, B. (2020b) Online mental health services in China during the COVID-19 outbreak. *Lancet Psychiatry*, Published Online February 18, 2020 [https://doi.org/10.1016/S2215-0366\(20\)30077-8](https://doi.org/10.1016/S2215-0366(20)30077-8)
4. ONS (2020) Deaths involving COVID-19 by local area and socioeconomic deprivation: deaths occurring between 1 March and 17 April 2020. <https://www.ons.gov.uk/peoplepopulationandcommunity/birthsdeathsandmarriages/deaths/bulletins/deathsinvolvingcovid19bylocalareasanddeprivation/deathsoccurringbetween1marchand17april> (accessed 12 May 2020)
5. Spencer L, Ritchie J, Ormston R, O'Connor W, Barnard M. (2014a) Analysis: Principles and Processes In: Ritchie J et al (eds). *Qualitative research practice: a guide for social science students and researchers*, 2nd edn. London: Sage.
6. Spencer L, Ritchie J, O'Connor W, Morrell G, Ormston R. (2014b) Analysis in Practice. In: Ritchie J et al (eds). *Qualitative research practice: a guide for social science students and researchers*, 2nd edn. London: Sage.
7. Baldwin, S., Bick, D. (2021) Using framework analysis in health visiting research: Exploring first-time fathers' mental health and wellbeing. *Journal of Health Visiting*, 9(5): 206-213.
8. Lincoln, Y.S., Guba, E.G. (1985). *Naturalistic inquiry*. Newbury Park, CA: Sage Publications.
9. British Medical Association (2020) BMA COVID-19 survey. <https://www.bma.org.uk/advice-and-support/covid-19/what-the-bma-is-doing/covid-19-bma-actions-and-policy/covid-19-analysing-the-impact-of-coronavirus-on-doctors>

- 1  
2  
3 10. Royal College of Nursing (2020) Researching the impact of COVID-19: ICON  
4 Study [https://www.rcn.org.uk/magazines/bulletin/2020/june/icon-research-  
6 nursing-study-professor-kelly-covid-19](https://www.rcn.org.uk/magazines/bulletin/2020/june/icon-research-<br/>5 nursing-study-professor-kelly-covid-19)  
7
- 8  
9 11. Williamson, V., Murphy, D., Greenberg, N. (2020) COVID-19 and experiences of  
10 moral injury in frontline key workers. *Occupational Medicine*, 70:317–319.  
11
- 12  
13 12. Maben, J., Bridges, J. (2020) Covid-19: Supporting nurses' psychological and  
14 mental health. *Journal of Clinical Nursing*, 29:2742–2750.  
15
- 16  
17 13. Bloomfield, M., Greene, T., Billings, J. (2020) Covid trauma response working  
18 group rapid opinion: The case for a trauma-informed response to COVID-19.  
19 <https://www.traumagroup.org/>  
20
- 21  
22 14. Moreno, C., Wykes, T., Galderisi, S., Nordentoft, M., Crossley, N., Jones, N.,  
23 Cannon, M., Correll, C.U., Byrne, L., Carr, S., Chen, E.Y.H., Gorwood, P.,  
24 Johnson, S., Kärkkäinen, H., Krystal, J.H., Lee, J., Lieberman, J., López-  
25 Jaramillo, C., Männikkö, M., Phillips, M.R., Uchida, H., Vieta, E., Vita, A.,  
26 Arango, C. (2020) How mental health care should change as a consequence of  
27 the COVID-19 pandemic. *Lancet Psychiatry* 2020; 7: 813–24.  
28
- 29  
30 15. Cai, H., Tu, B., Ma, J., et al. (2020) Psychological impact and coping strategies  
31 of frontline medical staff in Hunan between January and March 2020 during the  
32 outbreak of coronavirus disease 2019 (COVID-19) in Hubei, China. *Med Sci*  
33 *Monit.*, 26:e924171-1-16.  
34
- 35  
36 16. Shaukat, N., Mansoor Ali, D., Razzak, J. (2020) Physical and mental health  
37 impacts of COVID-19 on healthcare workers: a scoping review. *International*  
38 *Journal of Emergency Medicine*, 13:40. [https://doi.org/10.1186/s12245-020-  
40 00299-5](https://doi.org/10.1186/s12245-020-<br/>39 00299-5)  
41
- 42  
43 17. Simione, L. Gnagnarella, C. (2020) Differences between health workers and  
44 general population in risk perception, behaviors, and psychological distress  
45 related to COVID-19 spread in Italy. <https://psyarxiv.com/84d2c/>  
46
- 47  
48 18. Shreffler, J., Petrey, J., Huecker, M. (2020) The Impact of COVID-19 on  
49 Healthcare Worker Wellness: A Scoping Review. *Western Journal of Emergency*  
50 *Medicine*, 21(5): 1059-1066.  
51
- 52  
53 19. Wu, Y., Wang, J., Luo, C., et al. (2020) A comparison of burnout frequency  
54 among oncology physicians and nurses working on the front lines and usual  
55 wards during the COVID-19 epidemic in Wuhan, China. *J Pain Symptom*  
56 *Manage*, 60(1):e60-5.  
57  
58  
59  
60

- 1  
2  
3 20. Thomas, C., Quilter-Pinner, H. (2020) Care fit for carers: ensuring the safety and  
4 welfare of NHS and social care workers during and after Covid-19. IPPR, the  
5 Institute for Public Policy Research.  
6 <https://www.ippr.org/research/publications/care-fit-for-carers>  
7
- 8 21. Coto, J., Restrepo, A., Ivette, C., Prentiss, S. (2020) The impact of COVID-19 on  
9 allied health professions. PLoS ONE 15(10): e0241328.  
10 <https://doi.org/10.1371/journal.pone.0241328>  
11
- 12  
13 22. Imo, U.O. (2018) Burnout and psychiatric morbidity among doctors in the UK: a  
14 systematic literature review of prevalence and associated factors. British  
15 Psychiatric Bulletin, 41: 197-204.  
16
- 17  
18 23. Koutsimani, P., Montgomery, A., Georganta, K. (2019) The Relationship  
19 Between Burnout, Depression, and Anxiety: A Systematic Review and Meta-  
20 Analysis. Frontiers of Psychology, 10:284. doi: 10.3389/fpsyg.2019.00284  
21
- 22  
23 24. World Health Organization (2020) Mental health and psychosocial  
24 considerations during the COVID-19 outbreak.  
25 [www.who.int/docs/defaultsource/coronaviruse/mental-health-considerations.pdf](http://www.who.int/docs/defaultsource/coronaviruse/mental-health-considerations.pdf)  
26
- 27  
28 25. Baldwin, S., Stephen, R., Bishop, P., Kelly, P. (2020) Development of the  
29 Emotional Wellbeing at Work Virtual Programme to support UK health visiting  
30 teams. Journal of Health Visiting, 8(12): 516-522.  
31
- 32  
33 26. West, M., Bailey, S., Williams, E. (2020) The courage of compassion: Supporting  
34 nurses and midwives to deliver high-quality care.  
35 [www.kingsfund.org.uk/publications/courage-compassion-supporting-nurses-](http://www.kingsfund.org.uk/publications/courage-compassion-supporting-nurses-)  
36
- 37  
38 27. Royal College of Nursing (2015) Stress and you: a short guide to coping with  
39 pressure and stress. Healthy workplace, healthy you. London: RCN.  
40
- 41  
42 28. Jones, N., Seddon, R., Fear, N. T., McAllister, P., Wessely, S., Greenberg, N.  
43 (2012) Leadership, cohesion, morale, and the mental health of UK armed forces  
44 in Afghanistan. Psychiatry, 2012(75), 49–59.  
45
- 46  
47 29. Adams, J. G., Walls, R. M. (2020) Supporting the health care workforce during  
48 the COVID-19 global epidemic. JAMA, 323(15), 1439  
49 <https://doi.org/10.1001/jama.2020.3972>  
50
- 51  
52 30. Billings, J., Kember, T., Greene, T., Grey, N., El-Leithy, S., Lee, D., Bloomfield,  
53 M. (2020) Guidance for planners of the psychological response to stress  
54 experienced by hospital staff associated with COVID: Early interventions. COVID  
55 trauma response working Group rapid Guidance. <https://www.aomrc.org.uk/wp->  
56  
57  
58  
59  
60

[content/uploads/2020/03/Guidance-for-planners-of-the-psychological-response-to-stress-experienced-by-HCWs-COVID-trauma-response-working-group.pdf](https://www.bmjopen.com/content/uploads/2020/03/Guidance-for-planners-of-the-psychological-response-to-stress-experienced-by-HCWs-COVID-trauma-response-working-group.pdf)

31. Chen, SC., Lai, YH., Tsay, SL. (2020) Nursing Perspectives on the Impacts of COVID-19. *The Journal of Nursing Research*, 28(3): Pe85.  
doi:10.1097/jnr.0000000000000389
32. Maslow, A. H. (1943). A theory of human motivation. *Psychology Review*, 50 (4), 370-96.
33. Dewey, C., Hingle, S., Goelz, E., Linzer, M. (2020) Supporting clinicians during the COVID-19 pandemic. *Ann Intern Med*, 2:172(11):752-753.
34. Giannis, D., Geropoulos, G., Matenoglou, E. (2020) Impact of coronavirus disease 2019 on healthcare workers: beyond the risk of exposure. *Postgrad Med Journal*, 0:1–3.
35. Greenberg, N., Wessely, S., Wykes, T. (2015) Potential mental health consequences for workers in the Ebola Regions of West Africa- a lesson for all challenging environments. *Journal of Mental Health*, 24(1): 1–3.
36. NHS Employers (2019) Stress and its impact on the workplace.  
<https://www.nhsemployers.org/retention-and-staff-experience/health-and-wellbeing/taking-a-targeted-approach/taking-a-targeted-approach/stress-and-its-impact-on-the-workplace>

**Figure 1: Preliminary codes, initial thematic framework and final categories and sub-categories**

Figure 1: Preliminary codes, initial thematic framework and final categories and sub-categories

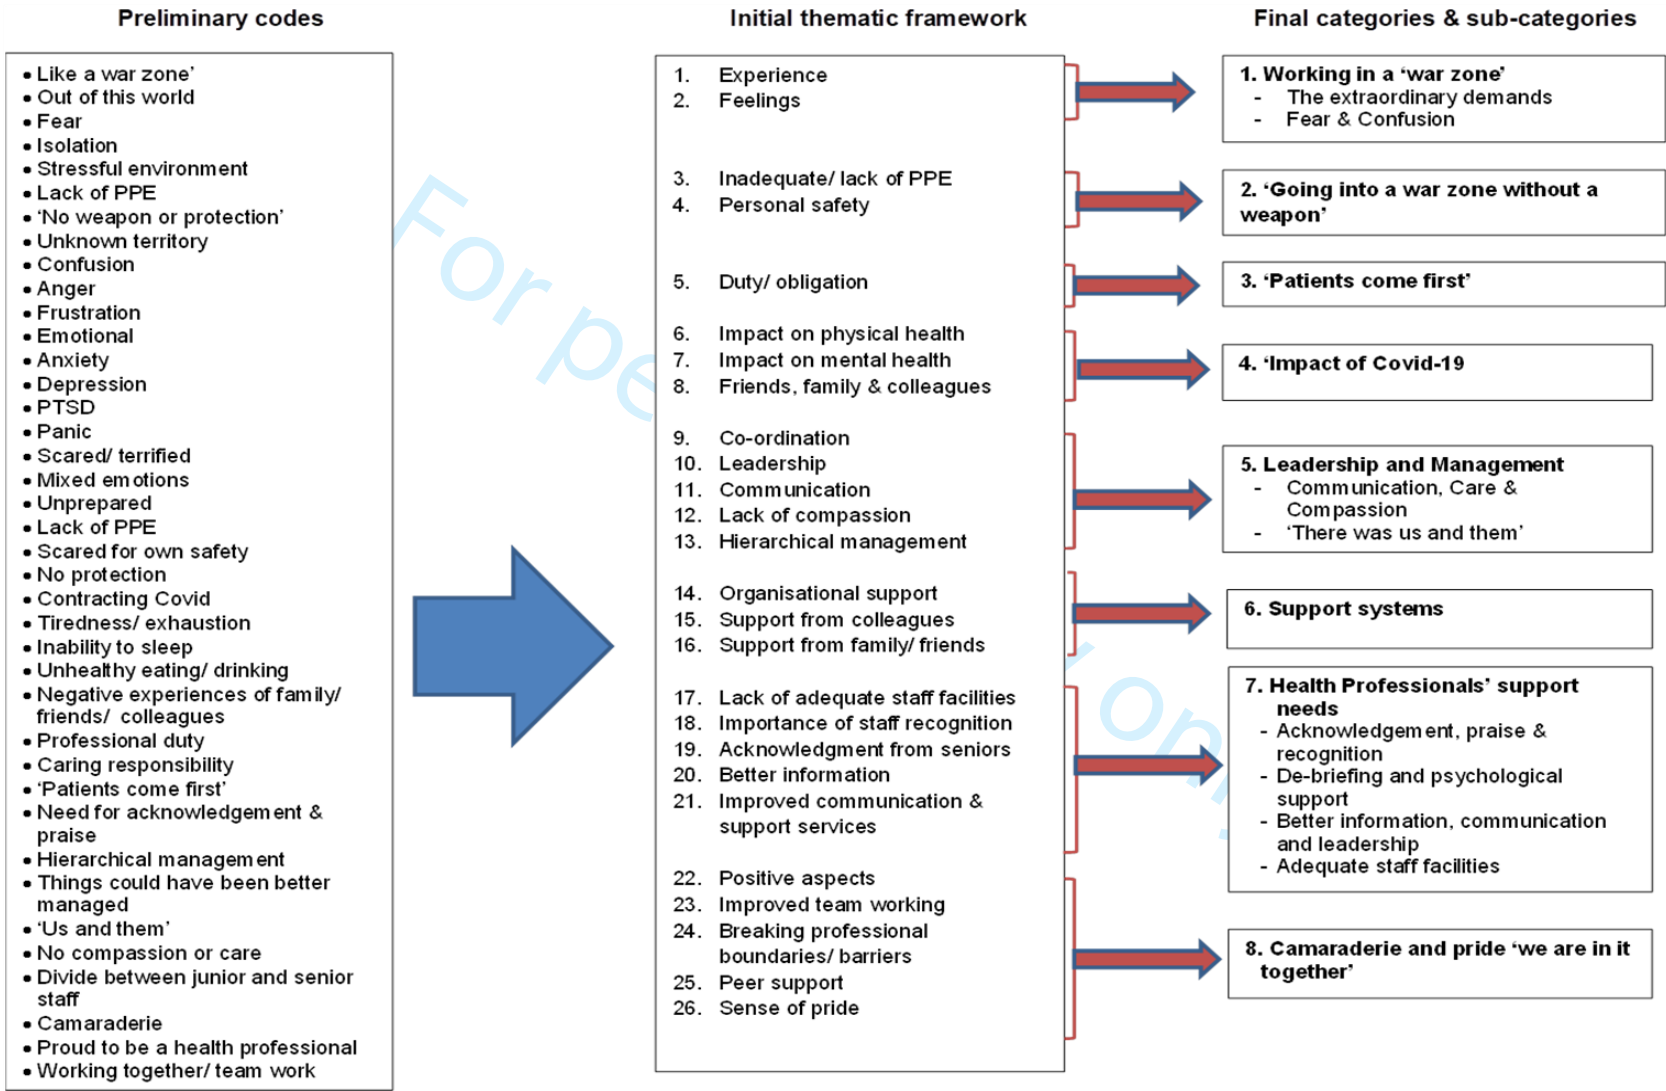

**Appendix - 1**  
**CONSENT FORM**

Title of Project: Study of frontline clinicians during COVID-19

Name of Researcher taking consent: Sharin Baldwin

Please initial box

1. I confirm that I have read the information sheet dated 25/06/20 (version 2) for the above study. I have had the opportunity to consider the information, ask questions and have had these answered satisfactorily.
2. I understand that my participation is voluntary and that I am free to withdraw at any time without giving any reason, without my medical care or legal rights being affected.
3. I understand that the information collected about me will be used to support other research in the future, and may be shared anonymously with other researchers.
4. I understand that the interview will be audio- recorded.
5. I agree to take part in the above study.

|                     |      |           |
|---------------------|------|-----------|
|                     |      |           |
| Name of Participant | Date | Signature |

|                               |      |           |
|-------------------------------|------|-----------|
|                               |      |           |
| Name of Person taking consent | Date | Signature |

*When completed: 1 for participant; 1 for researcher site file.*

## Appendix – 2

### Interview Topic Guide

***The interview should take no longer than 60 minutes and you are free to leave the study at any point. Do you have any questions before we start the interview?***

1. Tell me about your experience of working during the COVID-19 pandemic?
2. How do you feel about it at the time? Could you describe the overall feelings while you were working with COVID-19 patients?
3. How prepared did you feel? What would have helped you to prepare better?
4. How has working during this period impacted on your physical health?
5. How has working during this period impacted on your emotional/ mental health?
6. How has the pandemic affected your friends and family? What impact has that had on your wellbeing?
7. How has the pandemic affected your relationships with work colleagues? What impact has that had on your wellbeing?
8. How have you coped with the challenges during this period?
9. What available support systems/ services are you aware of?
10. What support or resources have you accessed? *This could be face-to-face, telephone, online etc.*
11. How were you supported in your workplace? How was the support from your team?  
How was the support from the wider organisation?
12. What support, information, or resources did you find helpful?
13. What other information/ resources do you think would help you or you would find useful?
14. What have been the barriers to accessing help/ support?
15. What has/ would enable you to better access help or support?
16. What would help you prepare better if there is second surge?
17. Is there anything else that you would like to share about your experiences that I haven't asked?

***This is the end of the interview. I would like to thank you very much for taking part in this study. Do you have any questions you would like to ask?***



## Consolidated criteria for reporting qualitative studies (COREQ): 32-item checklist

Developed from:

Tong A, Sainsbury P, Craig J. Consolidated criteria for reporting qualitative research (COREQ): a 32-item checklist for interviews and focus groups. *International Journal for Quality in Health Care*. 2007. Volume 19, Number 6: pp. 349 – 357

**YOU MUST PROVIDE A RESPONSE FOR ALL ITEMS. ENTER N/A IF NOT APPLICABLE**

| No. Item                                       | Guide questions/description                                                                                                                              | Reported on Page #  |
|------------------------------------------------|----------------------------------------------------------------------------------------------------------------------------------------------------------|---------------------|
| <b>Domain 1: Research team and reflexivity</b> |                                                                                                                                                          |                     |
| <i>Personal Characteristics</i>                |                                                                                                                                                          |                     |
| 1. Interviewer/facilitator                     | Which author/s conducted the interview or focus group?                                                                                                   | Pages 6-7           |
| 2. Credentials                                 | What were the researcher's credentials?<br>E.g. PhD, MD                                                                                                  | Title page          |
| 3. Occupation                                  | What was their occupation at the time of the study?                                                                                                      | Page 6 & Title page |
| 4. Gender                                      | Was the researcher male or female?                                                                                                                       | Female              |
| 5. Experience and training                     | What experience or training did the researcher have?                                                                                                     | Title page          |
| <i>Relationship with participants</i>          |                                                                                                                                                          |                     |
| 6. Relationship established                    | Was a relationship established prior to study commencement?                                                                                              | Pages 6-7           |
| 7. Participant knowledge of the interviewer    | What did the participants know about the researcher? e.g. personal goals, reasons for doing the research                                                 | Pages 6-7           |
| 8. Interviewer characteristics                 | What characteristics were reported about the interviewer/facilitator? e.g. Bias, assumptions, reasons and interests in the research topic                | Page 8-9            |
| <b>Domain 2: study design</b>                  |                                                                                                                                                          |                     |
| <i>Theoretical framework</i>                   |                                                                                                                                                          |                     |
| 9. Methodological orientation and Theory       | What methodological orientation was stated to underpin the study? e.g. grounded theory, discourse analysis, ethnography, phenomenology, content analysis | Page 7              |
| <i>Participant selection</i>                   |                                                                                                                                                          |                     |
| 10. Sampling                                   | How were participants selected? e.g. purposive, convenience, consecutive, snowball                                                                       | Pages 6-7           |
| 11. Method of approach                         | How were participants approached? e.g. face-to-face, telephone, mail, email                                                                              | Pages 6-7           |
| 12. Sample size                                | How many participants were in the study?                                                                                                                 | Page - 6            |
| 13. Non-participation                          | How many people refused to participate or dropped out? Reasons?                                                                                          | Page - 6            |



|                                        |                                                                                                                                 |               |
|----------------------------------------|---------------------------------------------------------------------------------------------------------------------------------|---------------|
| <i>Setting</i>                         |                                                                                                                                 |               |
| 14. Setting of data collection         | Where was the data collected? e.g. home, clinic, workplace                                                                      | Page - 6      |
| 15. Presence of non-participants       | Was anyone else present besides the participants and researchers?                                                               | Page 6        |
| 16. Description of sample              | What are the important characteristics of the sample? e.g. demographic data, date                                               | Pages 8-9     |
| <i>Data collection</i>                 |                                                                                                                                 |               |
| 17. Interview guide                    | Were questions, prompts, guides provided by the authors? Was it pilot tested?                                                   | Page - 6      |
| 18. Repeat interviews                  | Were repeat inter views carried out? If yes, how many?                                                                          | N/A           |
| 19. Audio/visual recording             | Did the research use audio or visual recording to collect the data?                                                             | Pages 6-7     |
| 20. Field notes                        | Were field notes made during and/or after the inter view or focus group?                                                        | Page - 7      |
| 21. Duration                           | What was the duration of the inter views or focus group?                                                                        | Pages 6-7     |
| 22. Data saturation                    | Was data saturation discussed?                                                                                                  | Page - 6      |
| 23. Transcripts returned               | Were transcripts returned to participants for comment and/or correction?                                                        | Pages 6-7     |
| <b>Domain 3: analysis and findings</b> |                                                                                                                                 |               |
| <i>Data analysis</i>                   |                                                                                                                                 |               |
| 24. Number of data coders              | How many data coders coded the data?                                                                                            | Page - 7      |
| 25. Description of the coding tree     | Did authors provide a description of the coding tree?                                                                           | N/A           |
| 26. Derivation of themes               | Were themes identified in advance or derived from the data?                                                                     | Page - 7      |
| 27. Software                           | What software, if applicable, was used to manage the data?                                                                      | N/A           |
| 28. Participant checking               | Did participants provide feedback on the findings?                                                                              | Pages 6-7     |
| <i>Reporting</i>                       |                                                                                                                                 |               |
| 29. Quotations presented               | Were participant quotations presented to illustrate the themes/findings? Was each quotation identified? e.g. participant number | Pages 10 -25  |
| 30. Data and findings consistent       | Was there consistency between the data presented and the findings?                                                              | Pages 10 -25  |
| 31. Clarity of major themes            | Were major themes clearly presented in the findings?                                                                            | Pages 10 -25  |
| 32. Clarity of minor themes            | Is there a description of diverse cases or discussion of minor themes?                                                          | Pages 25 - 30 |

Once you have completed this checklist, please save a copy and upload it as part of your submission. When requested to do so as part of the upload process, please select the file type: *Checklist*. You will NOT be able to proceed with submission unless the checklist has been uploaded. Please DO NOT include this checklist as part of the main manuscript document. It must be uploaded as a separate file.
